# 1 **Biophysical mechanisms in the mammalian respiratory oscillator** 2 **re-examined with a new data-driven computational model**

3  
4 Ryan S. Phillips<sup>1,2</sup>, Tibin T. John<sup>1</sup>, Hidehiko Koizumi<sup>1</sup>, Yaroslav I. Molkov<sup>3,4</sup>, Jeffrey C.  
5 Smith<sup>1</sup>

6  
7 <sup>1</sup>Cellular and Systems Neurobiology Section, NINDS, NIH, Bethesda, MD

8 <sup>2</sup>Department of Physics, University of New Hampshire, Durham, NH

9 <sup>3</sup>Department of Mathematics and Statistics, Georgia State University, Atlanta, GA

10 <sup>4</sup>Neuroscience Institute, Georgia State University, Atlanta, GA

## 11 12 13 **Abstract**

14 An autorhythmic population of excitatory neurons in the brainstem pre-Bötzinger complex is  
15 a critical component of the mammalian respiratory oscillator. Two intrinsic neuronal  
16 biophysical mechanisms—a persistent sodium current ( $I_{NaP}$ ) and a calcium-activated non-  
17 selective cationic current ( $I_{CAN}$ )—were proposed to individually or in combination generate  
18 cellular- and circuit-level oscillations, but their roles are debated without resolution. We re-  
19 examined these roles with a new computational model of an excitatory population with  
20 randomly distributed  $I_{NaP}$  and  $I_{CAN}$  conductances and synaptic connections. This model  
21 robustly reproduces experimental data showing contrary to previous hypotheses, rhythm  
22 generation is independent of  $I_{CAN}$  activation, which instead determines population activity  
23 amplitude. The novel insight is that this occurs when  $I_{CAN}$  is primarily activated by neuronal  
24 calcium fluxes driven by synaptic mechanisms. Rhythm depends critically on  $I_{NaP}$  in a  
25 subpopulation forming the rhythmogenic kernel. The model explains how the rhythm and  
26 amplitude of respiratory oscillations involve distinct biophysical mechanisms.

## 27 28 29 **Introduction**

30 Defining cellular and circuit mechanisms generating the vital rhythm of breathing in mammals  
31 remains a fundamental unsolved problem of wide-spread interest in neurophysiology (Richter  
32 & Smith, 2014; Del Negro et al., 2018), with potentially far-reaching implications for

33 understanding mechanisms of oscillatory circuit activity and rhythmic motor pattern generation  
34 in neural systems (Marder & Calabrese, 1996; Buzsaki, 2006; Grillner, 2006; Kiehn, 2006).  
35 The brainstem pre-Bötzinger complex (pre-BötC) region (Smith et al., 1991) located in the  
36 ventrolateral medulla oblongata is established to contain circuits essential for respiratory  
37 rhythm generation (Smith et al., 2013; Del Negro et al., 2018), but the operational cellular  
38 biophysical and circuit synaptic mechanisms are continuously debated. Pre-BötC excitatory  
39 neurons and circuits have autorhythmic properties and drive motor circuits that can be isolated  
40 and remain rhythmically active in living rodent brainstem slices in vitro. Numerous  
41 experimental and theoretical analyses have focused on the rhythmogenic mechanisms  
42 operating in these in vitro conditions to provide insight into biophysical and circuit processes  
43 involved, with potential relevance for rhythm generation during breathing in vivo (Feldman &  
44 Del Negro, 2006; Richter & Smith, 2014). The ongoing rhythmic activity in vitro has been  
45 suggested to arise from either a subset(s) of intrinsically bursting neurons which, through  
46 excitatory synaptic interactions, recruit and synchronize neurons within the network  
47 (pacemaker-network model) (Rekling & Feldman, 1998; Toporikova & Butera, 2011; Ramirez  
48 et al., 2004), or as an emergent network property through recurrent excitation (Jasinski et al.,  
49 2013) and/or synaptic depression (group pacemaker model) (Rubin et al., 2009).

50 From these previous analyses, involvement of two possible cellular-level biophysical  
51 mechanisms have been proposed. One based on a slowly inactivating persistent sodium current  
52 ( $I_{NaP}$ ) (Butera et al., 1999a), and the other on a calcium-activated non-selective cation current  
53 ( $I_{CAN}$ ) coupled to intracellular calcium ( $[Ca]_i$ ) dynamics (for reviews see (Rybak et al., 2014;  
54 Del Negro et al., 2010), or a combination of both mechanisms (Jasinski et al., 2013). Despite  
55 the extensive experimental and theoretical investigations of these sodium- and calcium-based  
56 mechanisms, the actual roles of  $I_{NaP}$ ,  $I_{CAN}$  and the critical source(s) of  $[Ca]_i$  transients in the  
57 pre-BötC are still unresolved. Furthermore, in pre-BötC circuits the process of rhythm  
58 generation must be associated with an amplitude of circuit activity sufficient to drive  
59 downstream circuits to produce adequate inspiratory motor output. Biophysical mechanisms  
60 involved in generating the amplitude of pre-BötC circuit activity have also not been  
61 established.

62  $I_{NaP}$  is proposed to mediate an essential oscillatory burst-generating mechanism since  
63 pharmacologically inhibiting  $I_{NaP}$  abolishes intrinsic neuronal rhythmic bursting as well as  
64 pre-BötC circuit inspiratory activity and rhythmic inspiratory motor output in vitro. Theoretical  
65 models of cellular and circuit activity based on  $I_{NaP}$  - dependent bursting mechanisms closely

66 reproduce experimental observations such as voltage-dependent frequency control, spike-  
67 frequency adaptation during bursts, and pattern formation of inspiratory motor output (Butera  
68 et al., 1999b; Pierrefiche et al., 2004; Smith et al., 2007). This indicates the plausibility of  $I_{NaP}$ -  
69 dependent rhythm generation.

70 In the pre-BötC,  $I_{CAN}$  was originally postulated to underlie intrinsic pacemaker-like  
71 oscillatory bursting at the cellular level and contribute to circuit-level rhythm generation, since  
72 intrinsic bursting in a subset of neurons in vitro was found to be terminated by the  $I_{CAN}$  inhibitor  
73 flufenamic acid (FFA) (Pena et al., 2004). Furthermore, inhibition of  $I_{CAN}$  in the pre-BötC  
74 reduces the amplitude of the rhythmic depolarization (inspiratory drive potential) driving  
75 neuronal bursting and can eliminate inspiratory motor activity in vitro (Pace et al., 2007).  $I_{CAN}$   
76 became the centerpiece of the group pacemaker model for rhythm generation, in which this  
77 conductance was proposed to be activated by inositol trisphosphate (IP3) receptor/ER-  
78 mediated intracellular calcium fluxes initiated via glutamatergic metabotropic receptor-  
79 mediated signaling in the pre-BötC excitatory circuits. The molecular correlate of  $I_{CAN}$  was  
80 postulated to be the transient receptor potential channel M4 (TRPM4) (Mironov 2008; Pace et  
81 al. 2007)– one of the two known  $Ca^{2+}$ -activated TRP channels (Guinamard et al., 2010; Ullrich  
82 et al., 2005). TRPM4 has now been identified by immunolabeling and RNA expression  
83 profiling in pre-BötC inspiratory neurons in vitro (Koizumi et al., 2018).

84 Investigations into the sources of intracellular  $Ca^{2+}$  activating  $I_{CAN}$ /TRPM4 suggested  
85 that (1) somatic calcium transients from voltage-gated sources do not contribute to the  
86 inspiratory drive potential (Morgado-Valle et al., 2008), (2) IP3/ER-mediated intracellular  $Ca^{2+}$   
87 release does not contribute to inspiratory rhythm generation in vitro), and (3) in the dendrites  
88 calcium transients may be triggered by excitatory synaptic inputs and travel in a wave  
89 propagated to the soma (Mironov 2008). Theoretical studies have demonstrated the plausibility  
90 of  $[Ca]_i$ - $I_{CAN}$  dependent bursting (Rubin et al., 2009; Toporikova & Butera, 2011), however  
91 these models omit  $I_{NaP}$  and/or depend on additional unproven mechanisms to generate  
92 intracellular calcium oscillations to provide burst termination, such as IP3 dependent calcium-  
93 induced calcium release (Toporikova & Butera, 2011), partial depolarization block of action  
94 potentials (Rubin, et al., 2009), and the  $Na^+/K^+$  pump (Jasinski et al., 2013). Surprisingly,  
95 pharmacological inhibition of  $I_{CAN}$ /TRPM4 has recently been shown to produce large  
96 reductions in the amplitude of pre-BötC inspiratory neuron population activity without  
97 significant perturbations of inspiratory rhythm (Koizumi et al., 2018). These new observations  
98 re-define the role of  $I_{CAN}$ , and require theoretical re-examination of pre-BötC neuronal

99 conductance mechanisms and network dynamics, particularly how rhythm generation  
100 mechanisms can be independent of  $I_{CAN}$ -dependent mechanisms generating the amplitude of  
101 network activity.

102 In this theoretical study, we examine the role of  $I_{CAN}$  in the pre-BötC by considering  
103 two plausible mechanisms of intracellular calcium fluxes: (1) from voltage-gated, and (2) from  
104 synaptically activated sources. We deduce that  $I_{CAN}$  is primarily activated by calcium transients  
105 that are coupled to rhythmic excitatory synaptic inputs originating from  $I_{NaP}$  dependent  
106 bursting inspiratory neurons. Additionally, we show that  $I_{CAN}$  contributes to the inspiratory  
107 drive potential by mirroring the excitatory synaptic current. Our new model explains the recent  
108 experimental observations obtained from in vitro neonatal rodent slices isolating the pre-BötC,  
109 showing large reductions in circuit activity amplitude by inhibiting  $I_{CAN}/TRPM4$  without  
110 perturbations of inspiratory rhythm generation in pre-BötC excitatory circuits in vitro. The  
111 model supports the novel concept that  $I_{CAN}$  activation in a subpopulation of pre-BötC excitatory  
112 neurons are critically involved in amplifying synaptic drive from a subset of neurons whose  
113 rhythmic bursting is critically dependent on  $I_{NaP}$  and forms the kernel for rhythm generation  
114 in vitro. The model shows how the functions of generating the rhythm and amplitude of  
115 inspiratory oscillations in pre-BötC excitatory circuits are determined by distinct biophysical  
116 mechanisms.

117

118

## 119 **Results**

### 120 **$\bar{g}_{CAN}$ Variation has Opposite Effects on Amplitude and Frequency of Network Bursting** 121 **in the $Ca_V$ and $Ca_{syn}$ Models**

122 Recent experimental work (Koizumi et al., 2018) has demonstrated that pharmacological  
123 inhibition of  $I_{CAN}/TRPM4$  in the pre-BötC in slices from in vitro neonatal mouse/rat slice  
124 preparations, strongly reduces the amplitude of (or completely eliminates) the inspiratory  
125 hypoglossal (XII) motor output, as well as the amplitude of pre-BötC excitatory circuit activity  
126 that is highly correlated with the decline of XII activity, while having little effect on inspiratory  
127 burst frequency. Here, we systematically examine the relationship between  $I_{CAN}$  conductance  
128 ( $\bar{g}_{CAN}$ ) on amplitude and frequency of circuit activity for voltage-gated ( $Ca_V$ ) and synaptically  
129 activated sources ( $Ca_{syn}$ ) of intracellular calcium. We found that that reduction of  $\bar{g}_{CAN}$  drives  
130 opposing effects on circuit activity amplitude and frequency that are dependent on the source  
131 of intracellular calcium transients (Fig. 1). In the  $Ca_V$  network, where calcium influx is

132 generated exclusively from voltage-gated calcium channels, increasing  $\bar{g}_{CAN}$  has no effect on  
 133 amplitude but increases the frequency of network oscillations (Fig. 1A, C, D). Conversely, in  
 134 the  $Ca_{syn}$  network where calcium influx is generated exclusively by excitatory synaptic input,  
 135 increasing  $\bar{g}_{CAN}$  strongly increases the amplitude and slightly decreases the oscillation  
 136 frequency (Fig. 1B, C, D).  
 137

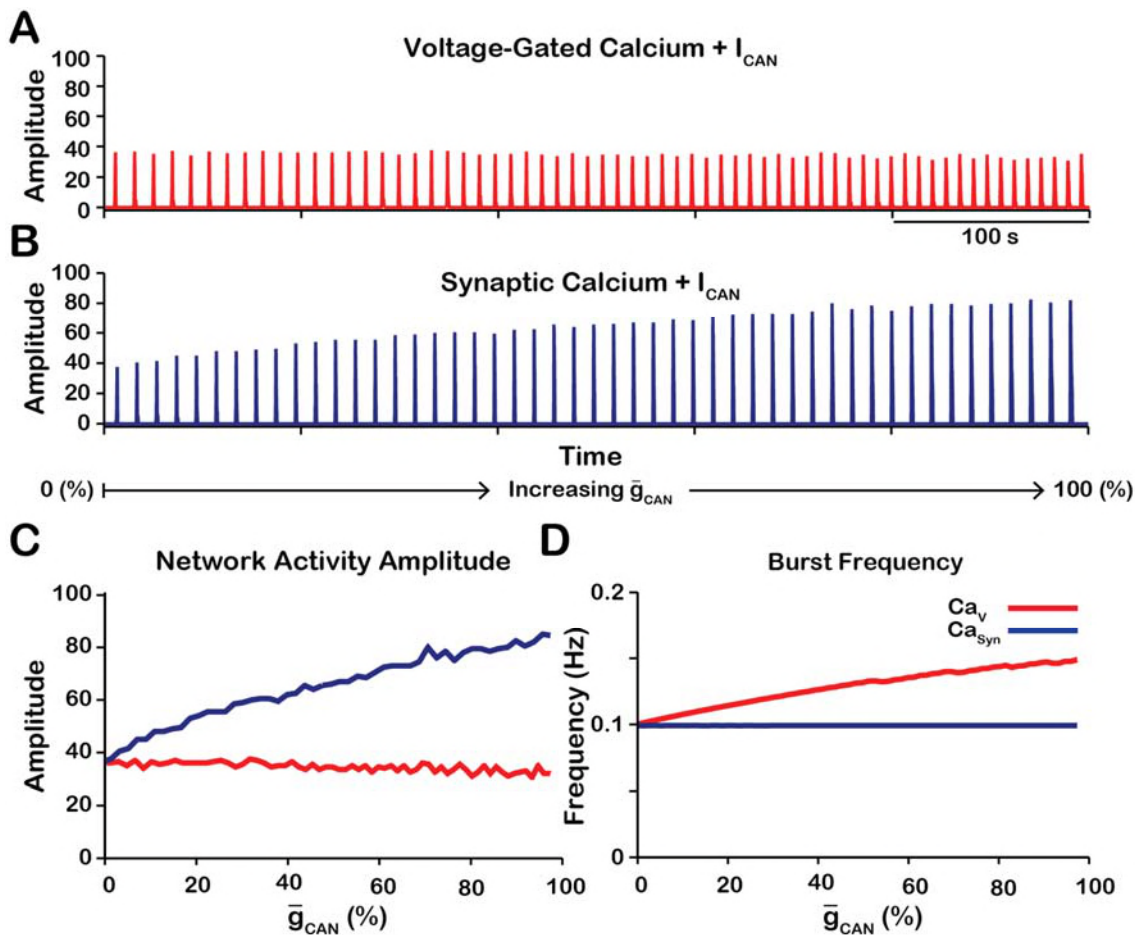

138

139 **Figure 1.** Manipulations of  $\bar{g}_{CAN}$  in the  $Ca_v$  and  $Ca_{syn}$  networks produce opposite effects on network activity  
 140 amplitude (spikes/s) and frequency. **(A & B)** Histograms of neuronal firing and voltage traces for pacemaker and  
 141 follower neurons in the  $Ca_v$ , and  $Ca_{syn}$  networks with linearly increasing  $\bar{g}_{CAN}$ . **(C)** Plot of  $\bar{g}_{CAN}$  vs network  
 142 activity amplitude for the  $Ca_v$  and  $Ca_{syn}$  networks in **A** and **B**. **(D)** Plot of  $\bar{g}_{CAN}$  vs network frequency for the  $Ca_v$   
 143 and  $Ca_{syn}$  networks in **A** and **B**.  $Ca_v$  network parameters:  $\bar{g}_{Ca} = 1.0$  (nS),  $P_{Ca} = 0.0$ ,  $P_{Syn} = 0.05$  and  $W_{max} =$   
 144  $0.2$  (nS).  $Ca_{syn}$  network parameters:  $\bar{g}_{Ca} = 0$  (nS),  $P_{Ca} = 0.01$ ,  $P_{Syn} = 0.05$  and  $W_{max} = 0.2$  (nS).

145

#### 146 **Effects of Subthreshold Activation of $I_{CAN}$ on Network Frequency**

147 In  $I_{NaP}$ -dependent bursting neurons in the pre-BötC, bursting frequency depends on their

148 excitability (i.e., baseline membrane potential) which can be controlled in different ways, e.g.  
149 by directly injecting a depolarizing current (Smith et al., 1991) or varying the conductance  
150 and/or reversal potentials of some ionic channels (Butera et al., 1999a). Due to their relatively  
151 short duty cycle, the bursting frequency in these neurons is largely determined by the interburst  
152 interval, defined as the time between the end of one burst and the start of the next. During the  
153 burst,  $I_{NaP}$  slowly inactivates resulting in burst termination and abrupt hyperpolarization of the  
154 membrane. The interburst interval is then determined by the amount of time required for  $I_{NaP}$   
155 to recover from inactivation and return the membrane potential back to the threshold for burst  
156 initiation. This process is governed by the kinetics of  $I_{NaP}$  inactivation gating variable  $h_{NaP}$ .  
157 Higher neuronal excitability reduces the value of  $h_{NaP}$  required to initiate bursting.  
158 Consequently, the time required to reach this value is decreased, which results in a shorter  
159 interburst interval and increased frequency.

160 To understand how changing  $\bar{g}_{CAN}$  affects network bursting frequency we quantified  
161 the values of  $h_{NaP}$  averaged over all pacemaker neurons immediately preceding each network  
162 burst and, also, the average  $I_{CAN}$  values between the bursts in the  $Ca_V$  and  $Ca_{syn}$  networks (Fig.  
163 2). In the  $Ca_V$  network,  $I_{Ca}$  as modeled remains residually activated between the bursts thus  
164 creating the background calcium concentration which partially activates  $I_{CAN}$ . Therefore,  
165 between the bursts  $I_{CAN}$  functions as a depolarizing leak current. Consistently, we found that  
166 in the  $Ca_V$  network increasing  $\bar{g}_{CAN}$  increases  $I_{CAN}$  (Fig. 2A) progressively depolarizing the  
167 network, which reduces the  $h_{NaP}$  threshold for burst initiation (Fig. 2B) and, thus, increases  
168 network frequency (Fig. 1D).

169 In the  $Ca_{syn}$  model the intracellular calcium depletes entirely during the interburst  
170 interval. Consequently, increasing  $\bar{g}_{CAN}$  has no effect on  $I_{CAN}$  (Fig. 2A) and frequency is  
171 essentially unaffected (Fig. 1D).

172

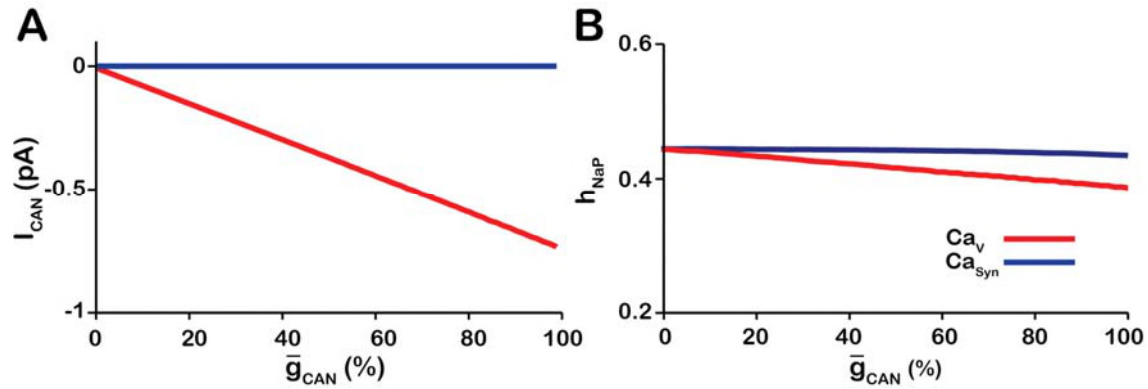

173

174 **Figure 2** Calcium source and  $\bar{g}_{CAN}$ -dependent effects on cellular properties regulating network frequency for the  
 175 simulations presented in Fig. 1. **(A)** Average magnitude of  $I_{CAN}$  in pacemaker neurons during the interburst  
 176 interval for the  $Ca_v$  (red) and  $Ca_{syn}$  (blue) networks. **(B)** Average inactivation of the burst generating current  
 177  $I_{NaP}$  in pacemaker neurons immediately preceding each network burst as a function of  $\bar{g}_{CAN}$  for the voltage-gated  
 178 and synaptic calcium networks.  $Ca_v$  Network Parameters:  $\bar{g}_{Ca} = 1.0$  (nS),  $P_{Ca} = 0.0$ ,  $P_{Syn} = 0.05$  and  $W_{max} =$   
 179  $0.2$  (nS).  $Ca_{syn}$  network parameters:  $\bar{g}_{Ca} = 0$  (nS),  $P_{Ca} = 0.01$ ,  $P_{Syn} = 0.05$  and  $W_{max} = 0.2$  (nS).

180

### 181 **Changes in Network Activity Amplitude Are Driven by Recruitment of Neurons**

182 Network activity amplitude is defined as the total number of spikes produced by the  
 183 network per a time bin. Consequently, changes in amplitude can only occur by increasing the  
 184 number of neurons participating in bursts (recruitment) and/or increasing the firing rate of the  
 185 recruited neurons. To analyze changes in amplitude, we quantified the number of recruited  
 186 neurons (Fig. 3A) and the average spike frequency in recruited neurons (Fig. 3B) as a function  
 187 of  $\bar{g}_{CAN}$  for both network models. In the  $Ca_v$  network, increasing  $\bar{g}_{CAN}$  increases the number  
 188 of recruited neurons (Fig. 3A), but decreases the average spiking frequency in recruited neurons  
 189 (Fig. 3B) which, together result in no change in amplitude (Fig. 1C). In the  $Ca_{syn}$  network,  
 190 increasing  $\bar{g}_{CAN}$  strongly increases the number of recruited neurons (Fig. 3A) and increases the  
 191 spike frequency of recruited neurons (Fig. 3B) resulting in a large increase in network activity  
 192 amplitude (Fig. 3C).

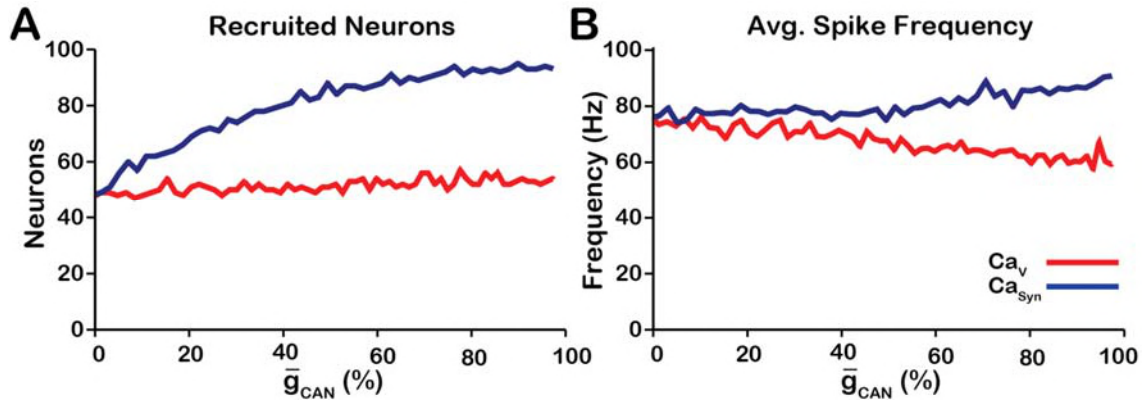

193

194 **Figure 3** Calcium source and  $\bar{g}_{CAN}$ -dependent effects on cellular properties regulating network activity amplitude  
195 for the simulations presented in Fig. 1. **(A)** Number of recruited neurons in the modeled population of 100 neurons  
196 as a function of  $\bar{g}_{CAN}$  for voltage-gated and synaptic calcium sources. The number of recruited neurons is defined  
197 as the peak number of spiking neurons per bin during a network burst. **(B)** Average spiking frequency of recruited  
198 neurons as a function of  $\bar{g}_{CAN}$  for the voltage-gated and synaptic calcium mechanism. Average spiking frequency  
199 is defined the number of spikes per bin divided by the number of recruited neurons. The parameters used in these  
200 simulations are:  $Ca_v$ :  $\bar{g}_{Ca} = 1.0$  (nS),  $P_{Ca} = 0.0$ ,  $P_{Syn} = 0.05$  and  $W = 0.2$  (nS).  $Ca_{syn}$ :  $\bar{g}_{Ca} = 0$  (nS),  $P_{Ca} =$   
201  $0.01$ ,  $P_{Syn} = 0.05$  and  $W = 0.2$  (nS).

202



203 **Manipulating  $\bar{g}_{CAN}$  in the  $Ca_{syn}$  Model is Qualitatively Equivalent to Changing the**  
204 **Strength of Synaptic Interactions**

205         Since changes in  $\bar{g}_{CAN}$  in the  $Ca_{syn}$  model primarily affect network activity amplitude  
206 through recruitment of follower neurons, and the network activity amplitude strongly depends  
207 on the strength of synaptic interactions, we next examined the relationship between  $\bar{g}_{CAN}$ ,  
208 synaptic strength and network activity amplitude and frequency (Fig. 4). Synaptic strength is  
209 defined as the number of neurons multiplied by the connection probability multiplied by the  
210 average weight of synaptic connections ( $N \cdot P_{syn} \cdot \frac{1}{2}W_{max}$ ). We found that the effects of varying  
211  $\bar{g}_{CAN}$  or the synaptic strength on network activity amplitude and frequency are qualitatively  
212 equivalent in the  $Ca_{syn}$  network which is indicated by symmetry of the heat plots (across the  
213 X=Y line) in Fig. 4A, B. We further investigated and compared the effect of reducing  $\bar{g}_{CAN}$  or  
214 the synaptic strength on network activity amplitude and frequency as well as the effects on the  
215 recruitment of follower neurons (Fig. 4C-F). To make this comparison, picked a starting point  
216 in the 2D parameter space between  $\bar{g}_{CAN}$  and synaptic strength where the network is bursting.  
217 Then in separate simulations we linearly reduced either  $\bar{g}_{CAN}$  or the synaptic strength to zero.  
218 We show that reducing either  $\bar{g}_{CAN}$  or the synaptic strength have very similar effects on  
219 network activity amplitude and frequency (Fig. 4C, D). Furthermore, the effect on follower  
220 neurons in both cases is nearly identical (Fig. 4E, F). Reducing either  $\bar{g}_{CAN}$  or the synaptic  
221 strength decreases the excitatory input to follower neurons during network oscillations which  
222 is a major component of the inspiratory drive potential. Therefore, in the  $Ca_{syn}$  network,  
223 manipulations of  $\bar{g}_{CAN}$  will affect the strength of the inspiratory drive potential in follower  
224 neurons in a way that is equivalent to changing the synaptic strength of the network. In contrast,  
225 manipulations of  $\bar{g}_{CAN}$  in the  $Ca_V$  network will only slightly affect the inspiratory drive  
226 potential in follower neurons due to changes in the average firing rate of active neurons (see  
227 Fig. 3B).

228

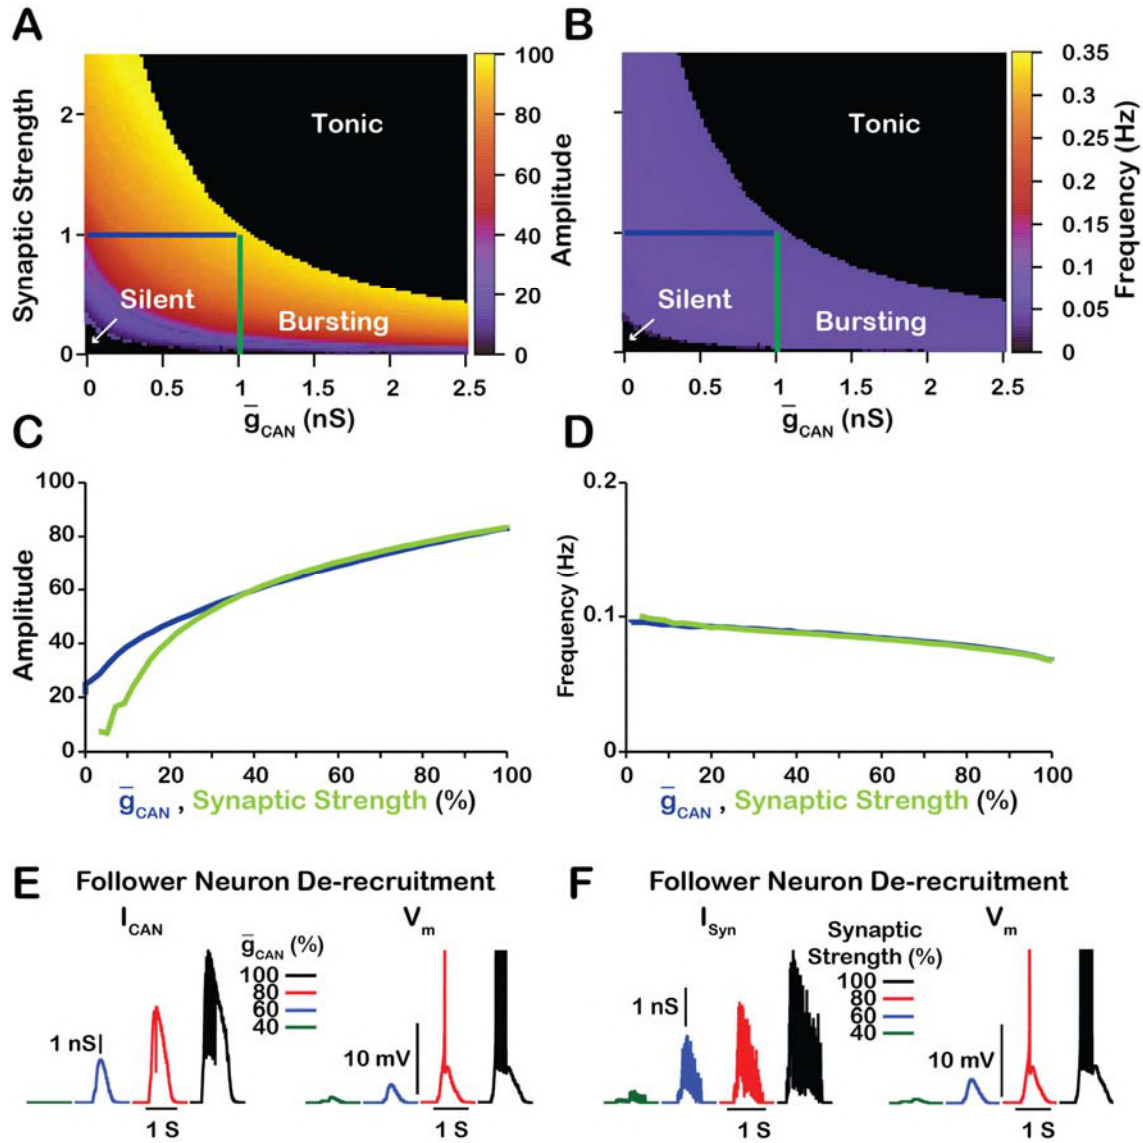

229

230 **Figure 4** Manipulations of synaptic strength ( $N \cdot P_{syn} \cdot \frac{1}{2} W_{max}$ ) and  $\bar{g}_{CAN}$  have equivalent effects on network

231 activity amplitude, frequency and recruitment of follower neurons. **(A & B)** Relationship between  $\bar{g}_{CAN}$ , synaptic

232 strength and the amplitude and frequency in the  $Ca_{syn}$  network. Notice the symmetry about the X=Y line in panels

233 **A** and **B**, which, indicates that changes in  $\bar{g}_{CAN}$  and or synaptic strength are qualitatively equivalent. Synaptic

234 strength was changed by varying  $W_{max}$ . **(C)** Relationship between network activity amplitude and the reduction

235 of  $\bar{g}_{CAN}$  (BLUE) or synaptic strength (GREEN). **(D)** Relationship between network frequency and the reduction

236 of  $\bar{g}_{CAN}$  (BLUE) or synaptic strength (GREEN). **(E & F)** Decreasing  $\bar{g}_{CAN}$  or synaptic strength de-recruits

237 follower neurons by reducing the inspiratory drive potential, indicated by the amplitude of subthreshold

238 depolarization, right traces. The solid blue and green lines in panels **A** and **B** represent the location in the 2D

239 parameter space of the corresponding blue and green curves in **C** and **D**. The action potentials in the right traces

240 of **E** and **F** are truncated to show the change in neuronal inspiratory drive potential. The parameters used for these

241 simulations are  $Ca_{syn}$ :  $\bar{g}_{Ca} = [0,0]$ ,  $P_{Ca} = 0.01$ ,  $P_{syn} = 1.0$  and  $W_{max} = var$

242

## 243 **Robustness of Amplitude and Frequency Effects**

244 We also examined if the effects are conserved in both the  $Ca_V$  and  $Ca_{Syn}$  networks over  
245 a range of network parameters. To test this, we investigated the dependence of network activity  
246 amplitude and frequency on  $\bar{g}_{CAN}$  and average synaptic weight for  $Ca_{Syn}$  and  $Ca_V$  networks  
247 with high ( $P_{Syn} = 1$ ) and low ( $P_{Syn} = 0.05$ ) connection probabilities, and high ( $g_{Ca} =$   
248  $0.1 nS, P_{Ca} = 0.1$ ), medium ( $g_{Ca} = 0.01 nS, P_{Ca} = 0.01$ ) and low ( $g_{Ca} = 0.001 nS, P_{Ca} =$   
249  $0.005$ ) strengths of calcium sources (Figures 5 and 6). We found that changing the synaptic  
250 connection probability and changing the strength of the calcium sources has no effect on the  
251 general relationship between  $\bar{g}_{CAN}$  and the amplitude or frequency of bursts in the  $Ca_V$  or  $Ca_{Syn}$   
252 networks. In other words, the general effect of increasing  $\bar{g}_{CAN}$  on amplitude and frequency is  
253 conserved in both networks regardless of the synaptic connection probability or strength of the  
254 calcium sources. Increasing the strength of the calcium sources does, however, affects the range  
255 of possible  $\bar{g}_{CAN}$  values where both networks produce rhythmic activity.

256 To summarize, in the  $Ca_V$  model, increasing  $\bar{g}_{CAN}$  increases frequency, through  
257 increased excitability but has no effect on amplitude. In contrast, in the  $Ca_{Syn}$  model,  
258 increasing  $\bar{g}_{CAN}$  slightly decreases frequency and increases amplitude. In this case, increasing  
259  $\bar{g}_{CAN}$  acts as a mechanism to increase the inspiratory drive potential and recruit previously  
260 silent neurons. Additionally, these features of the  $Ca_V$  and  $Ca_{Syn}$  models are robust and  
261 conserved across a wide range of network parameters.

262

263

264

265

266

267

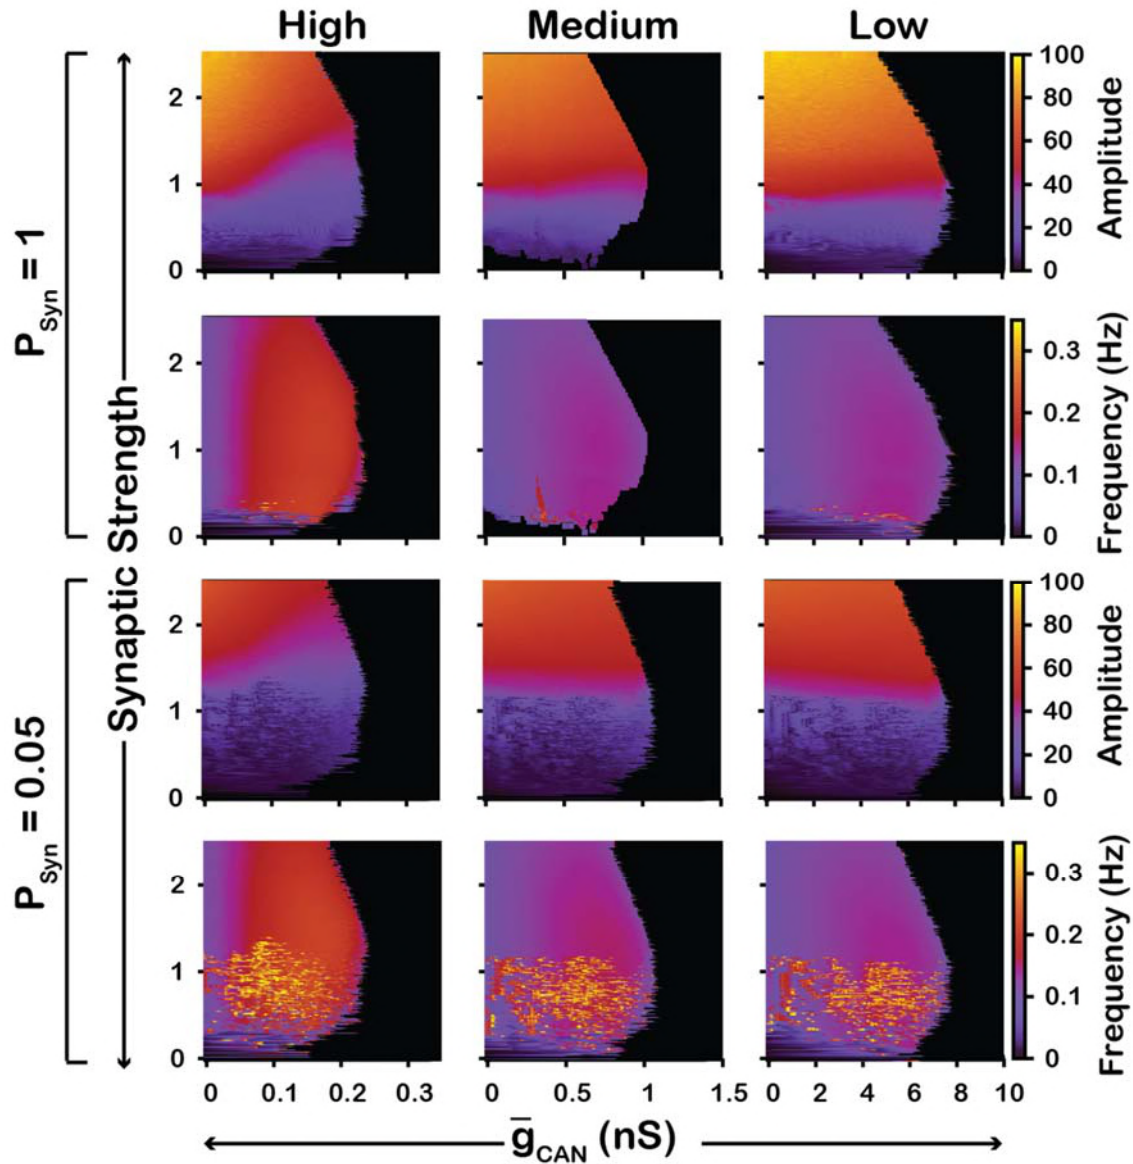

268

269 **Figure 5** Robustness of amplitude and frequency effects to changes in  $\bar{g}_{\text{CAN}}$  and synaptic strength in the  $\text{Ca}_V$   
270 network for 'high' (left), 'medium' (middle) and 'low' (right) conductance of the voltage-gated calcium channel  
271  $I_{\text{Ca}}$  as well as 'high' (top) and 'low' (bottom) network connection probabilities. Amplitude and frequency are  
272 indicated by color (scale bar at right). Black regions indicate tonic network activity.

273

274

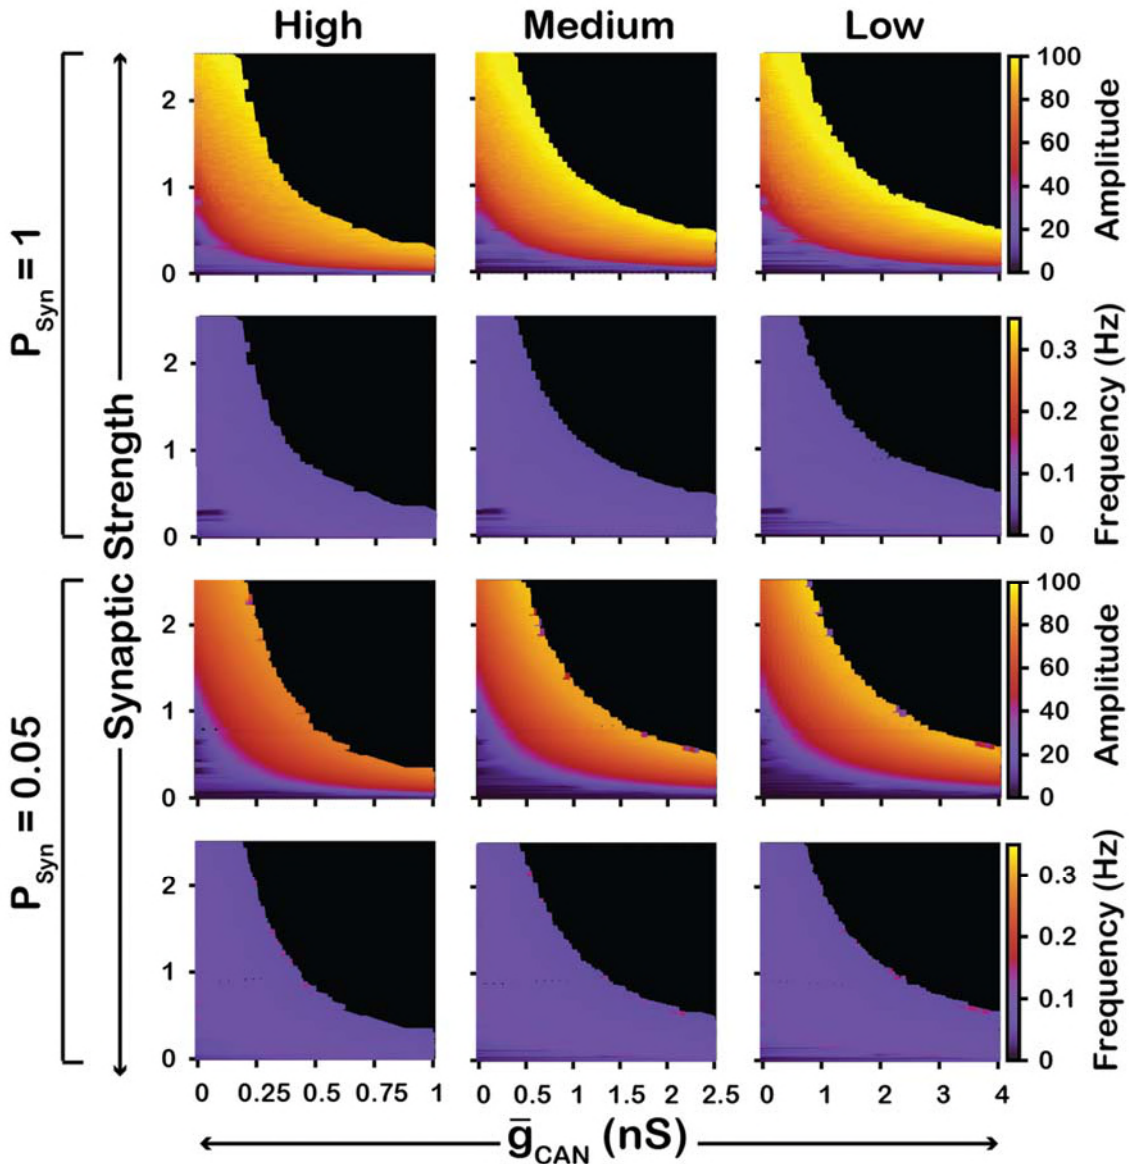

275

276 **Figure 6** Robustness of amplitude and frequency effects to changes in  $\bar{g}_{CAN}$  and synaptic strength in the  $Ca_{Syn}$   
 277 network for ‘high’(left), ‘medium’ (middle) and ‘low’ (right) calcium conductance in synaptic currents as well as  
 278 ‘high’(top) and ‘low’ (bottom) network connection probabilities. Amplitude and frequency are indicated by color  
 279 (scale bar at right). Black regions indicate tonic network activity.

280

### 281 **Intracellular Calcium Transients Activating $I_{CAN}$ Primarily Result from Synaptically-** 282 **Activated Sources**

283 In experiments where  $I_{CAN}$  was blocked by bath application of FFA or 9-phenanthrol  
 284 (Koizumi et al., 2018), the amplitude of network oscillations was strongly reduced and their  
 285 frequency remained unchanged. Our model revealed that the effects of  $I_{CAN}$  blockade on  
 286 amplitude and frequency depend on the source(s) of intracellular calcium (see Figs. 1 and 2).  
 287 If the calcium influx is exclusively voltage-gated, our model predicts that  $I_{CAN}$  blockade will

288 have no effect on amplitude but reduce the frequency. In contrast, if the calcium source is  
 289 exclusively synaptically gated, our model predicts that blocking  $I_{CAN}$  will strongly reduce the  
 290 amplitude and slightly increase the frequency. Therefore, a multi-fold decrease in amplitude,  
 291 seen experimentally, is consistent with the synaptically driven calcium influx mechanisms,  
 292 while constant bursting frequency may be due to calcium influx through both voltage- and  
 293 synaptically gated channels. Following predictions above, to reproduce experimental data, we  
 294 incorporated both mechanisms in the model and inferred their individual contributions by  
 295 finding the best fit. We found that the best match is observed (Fig. 7) if synaptically mediated  
 296 and voltage gated calcium influxes comprise about 95% and 5% of the total calcium influx,  
 297 respectively.  
 298

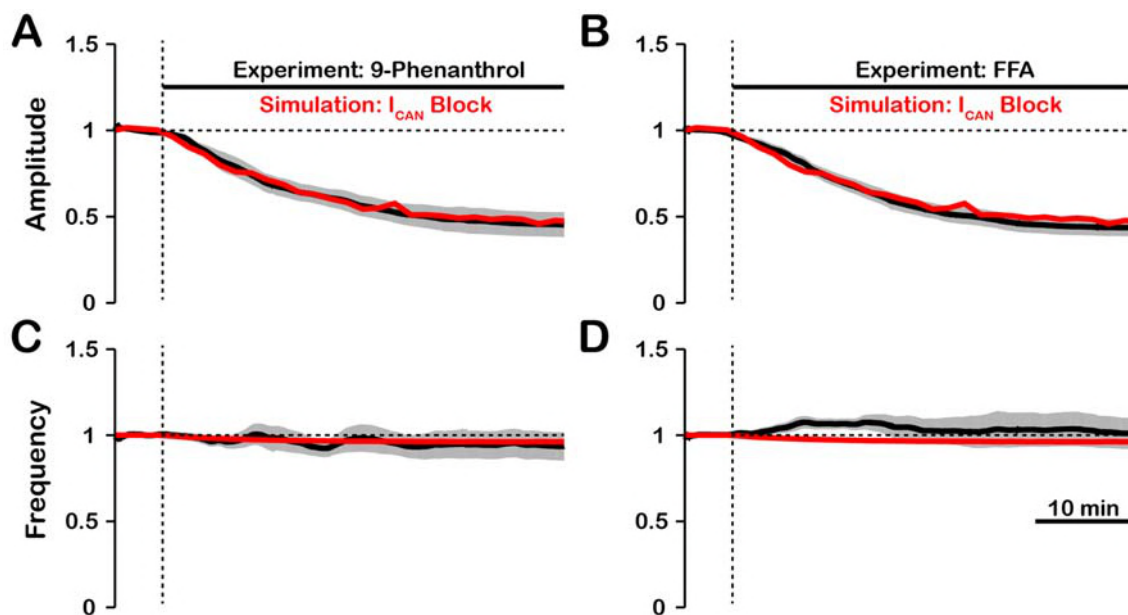

299  
 300 **Figure 7.** Experimental and simulated pharmacological blockade of  $I_{CAN}$  by (A & C) 9-phenanthrol and (B & D)  
 301 flufenamic acid (FFA). Both voltage-gated and synaptic sources of intracellular calcium are included.  
 302 Experimental blockade of  $I_{CAN}$  (black) by 9-phenanthrol and FFA significantly reduce the (A & B) amplitude of  
 303 network oscillations while having little effect on (C & D) frequency. The black line represents the mean and the  
 304 gray is the S.E.M. of experimental  $\text{[XII]}$  output recorded from neonatal rat brainstem slices in vitro, reproduced  
 305 from Koizumi et al., 2018. Simulated blockade of  $I_{CAN}$  (red) closely matches the reduction in (A & B) amplitude  
 306 of network oscillations and slight decrease in (C & D) frequency seen with 9-phenanthrol and FFA. Simulated  
 307 and experimental blockade begins at the vertical dashed line. Blockade was simulated by exponential decay of  
 308  $\bar{g}_{CAN}$  with the following parameters: 9-phenanthrol:  $\gamma_{Block} = 0.85$ ,  $\tau_{Block} = 357s$ ; FFA:  $\gamma_{Block} = 0.92$ ,  $\tau_{Block} =$   
 309  $415s$ . The network parameters are:  $\bar{g}_{Ca} = 0.00175$  (nS),  $P_{Ca} = 0.0275$ ,  $P_{Syn} = 0.05$  and  $W_{max} = 0.096$  (nS).  
 310

311  **$I_{NaP}$ -dependent and  $[Ca]_i$ - $I_{CAN}$  Sensitive Intrinsic Bursting**

312 In our model, we included  $I_{NaP}$ ,  $I_{CAN}$  as well as voltage-gated and synaptic mechanisms  
313 of  $Ca^{2+}$  influx. Activation of  $I_{CAN}$  by  $Ca_{Syn}$  is the equivalent mechanism used in other  
314 computational group-pacemaker models (Rubin et al., 2009; Song et al., 2015). Burst  
315 generation and termination in our model, however, are dependent on  $I_{NaP}$  (Butera et al., 1999a).  
316 We investigated the sensitivity of intrinsic bursting in our model to  $I_{NaP}$  and calcium channel  
317 blockade (Fig. 8). Intrinsic bursting was identified in neurons by zeroing the synaptic weights  
318 to simulate synaptic blockade.  $I_{NaP}$  and  $I_{Ca}$  blockade was simulated by setting  $\bar{g}_{NaP}$  and  $\bar{g}_{Ca}$   
319 to 0. We found that after decoupling the network ( $W_{max} = 0$ ) a subset of neurons remained  
320 rhythmically active (7%) and that these were all neurons with a high  $I_{NaP}$  conductance. In these  
321 rhythmically active neurons, bursting was abolished in all neurons by  $I_{NaP}$  blockade.  
322 Interestingly,  $I_{Ca}$  blockade applied before  $I_{NaP}$  blockade abolished intrinsic bursting in 2 of the  
323 7 neurons and  $I_{NaP}$  blockade applied afterwards abolished intrinsic bursting in the remaining  
324 5 neurons. Although only one rhythmogenic ( $I_{NaP}$ -based) mechanism exists in this model,  
325 bursting in a subset of these neurons is calcium sensitive. In calcium-sensitive bursters,  $Ca^{2+}$   
326 blockade abolishes bursting by reducing the intracellular calcium concentration and, hence,  
327  $I_{CAN}$  activation, which ultimately reduces excitability.  
328

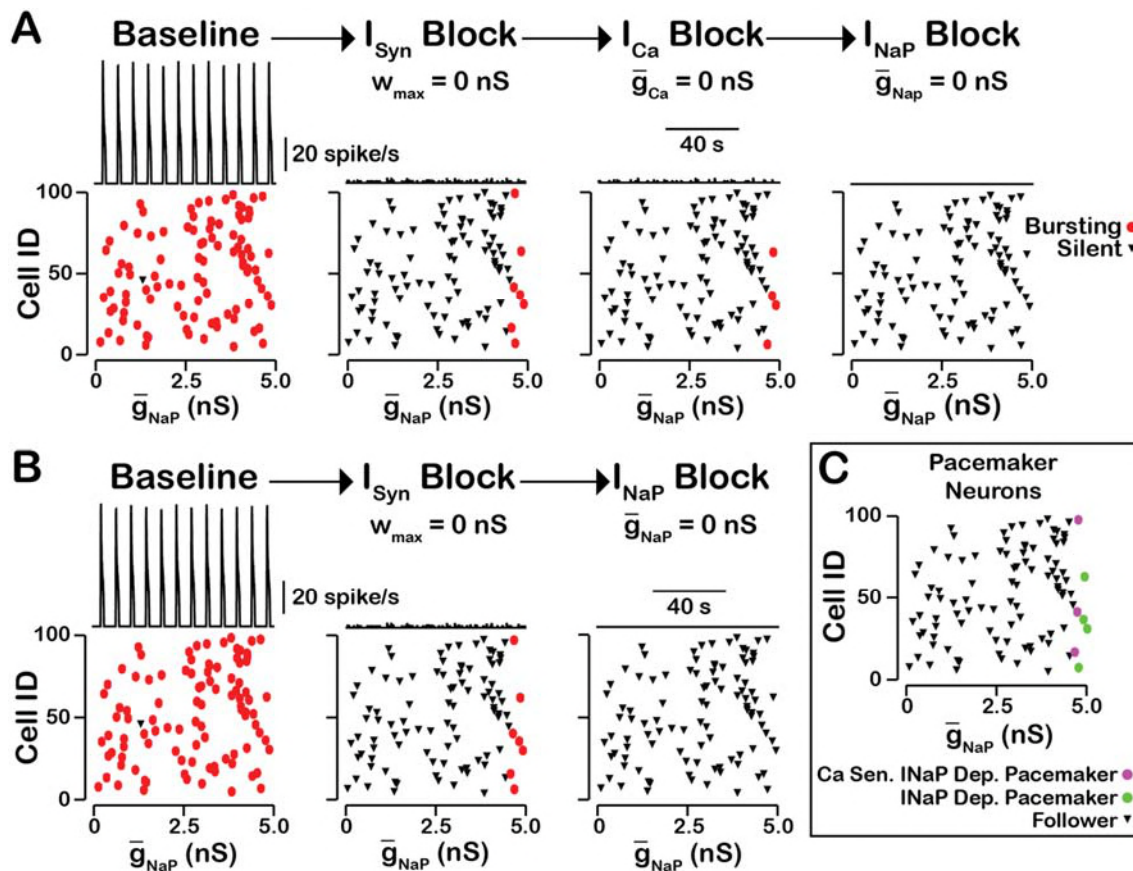

329

330 **Figure 8**  $I_{\text{NaP}}$ -dependent and  $\text{Ca}^{2+}$  sensitive intrinsic bursting. (A) From left to right, intrinsic bursters are first  
 331 identified by blocking synaptic connections. Then, calcium sensitive neurons are silenced and identified by  $I_{\text{Ca}}$   
 332 blockade. The remaining neurons are identified as sensitive to  $I_{\text{NaP}}$  block. Top traces show the network output and  
 333 Cell ID vs.  $\bar{g}_{\text{NaP}}$  scatter plots identify silent and bursting neurons under each condition. (B)  $I_{\text{NaP}}$  blockade after  
 334 synaptic blockade eliminates bursting in all neurons. Therefore, all intrinsic bursters are  $I_{\text{NaP}}$  dependent. (C)  
 335 Identification of calcium sensitive and  $I_{\text{NaP}}$ -dependent as well as calcium insensitive and  $I_{\text{NaP}}$ -dependent intrinsic  
 336 bursters. Notice that only the neurons with the highest value of  $\bar{g}_{\text{NaP}}$  are intrinsic bursters and that a subset of  
 337 these neurons are sensitive to calcium blockade but all are dependent on  $I_{\text{NaP}}$ . The network parameters are:  $\bar{g}_{\text{Ca}} =$   
 338  $0.00175 \text{ (nS)}$ ,  $P_{\text{Ca}} = 0.0275$ ,  $P_{\text{Syn}} = 0.05$  and  $W_{\text{max}} = 0.096 \text{ (nS)}$ .

339

### 340 The Rhythmogenic Kernel

341 Our simulations have shown that the primary role of  $I_{\text{CAN}}$  is amplitude but not oscillation  
 342 frequency modulation with little or no effect on network activity frequency. Here we examined  
 343 the neurons that remain active and maintain rhythm after  $I_{\text{CAN}}$  blockade (Fig. 9). We found that  
 344 the neurons that remain active are primarily neurons with the highest  $\bar{g}_{\text{NaP}}$  and that bursting in  
 345 these neurons is dependent on  $I_{\text{NaP}}$ . Some variability exists and neurons with relatively low  
 346  $\bar{g}_{\text{NaP}}$  value can remain active due to synaptic interactions while a neuron with a slightly higher  
 347  $\bar{g}_{\text{NaP}}$  without sufficient synaptic input may become silent. These neurons, that remain active



348 after complete blockade of  $I_{CAN}$ , form a  $I_{NaP}$ -dependent kernel of a rhythm generating circuit.  
 349

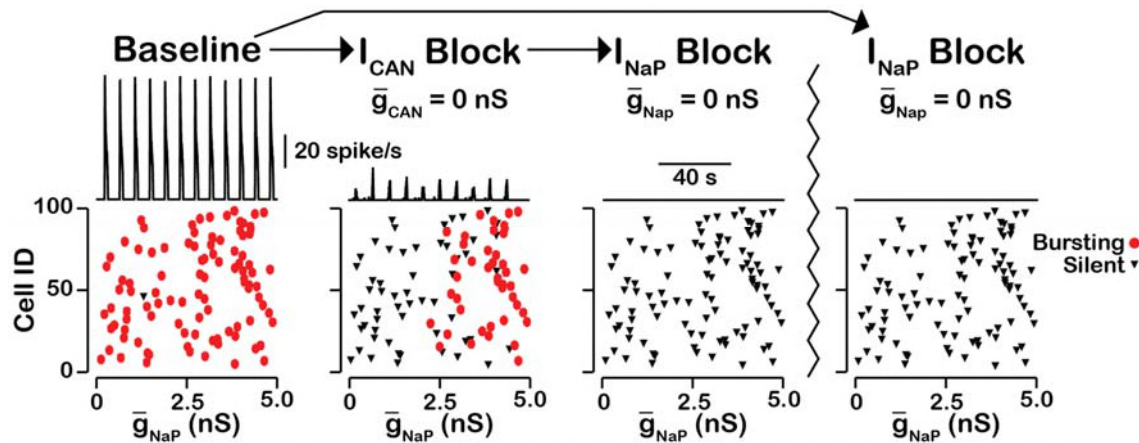

350  
 351 **Figure 9**  $I_{CAN}$  blockade reveals an  $I_{NaP}$ -dependent rhythmogenic kernel. The top traces show the network output  
 352 at baseline, after  $I_{CAN}$  blockade and  $I_{NaP}$  blockade. The bottom Cell ID vs.  $\bar{g}_{NaP}$  scatter plots identify silent and  
 353 bursting neurons in each condition. Notice that only neurons with relatively high  $\bar{g}_{NaP}$  remain active after  $I_{CAN}$   
 354 block. The network parameters used are:  $\bar{g}_{Ca} = 0.00175$  (nS),  $P_{Ca} = 0.0275$ ,  $P_{Syn} = 0.05$  and  $W_{max} =$   
 355  $0.096$  (nS).

356  
 357 **Network Activity Amplitude and Neuronal Spiking Frequency Correlate with**  
 358 **Intracellular Calcium Transients**

359 Dynamic calcium imaging has been utilized to assess activity of individual pre-BötC excitatory  
 360 neurons and populations of these excitatory neurons in vitro during pharmacological inhibition  
 361 of  $I_{CAN}$ /TRPM4 (Koizumi et al., 2018). In such imaging-based analyses of excitatory network  
 362 activity, the sources of calcium transients are not precisely known, but the calcium transients  
 363 are assumed to correlate with the spiking frequency of neurons and provide measurements that  
 364 are correlated with circuit activity as a whole, as the experimental data suggest. We compared  
 365 the network activity characterized by the average intracellular calcium concentration and the  
 366 network firing. We found that for a single network burst, the average intracellular calcium  
 367 concentration and network firing are highly correlated (Fig. 10A).

368 We also compared intracellular calcium transients and spiking frequency in individual  
 369 pacemaker and follower neurons (Fig. 10B). Pacemaker neurons drive network oscillations and  
 370 begin firing before the rest of the network. As a result, in the pacemaker neurons the action-  
 371 potential generation precedes calcium influx. Consequently, in pacemaker neurons the  $[Ca]_i$   
 372 and firing rate correlate poorly in the first portion of the burst. In follower neurons bursting is  
 373 dependent on synaptic input and recruitment through  $I_{CAN}$  activation. Thus, in follower  
 374 neurons, which make up most neurons, the  $[Ca]_i$  and action potential firing rate are highly

375 correlated.

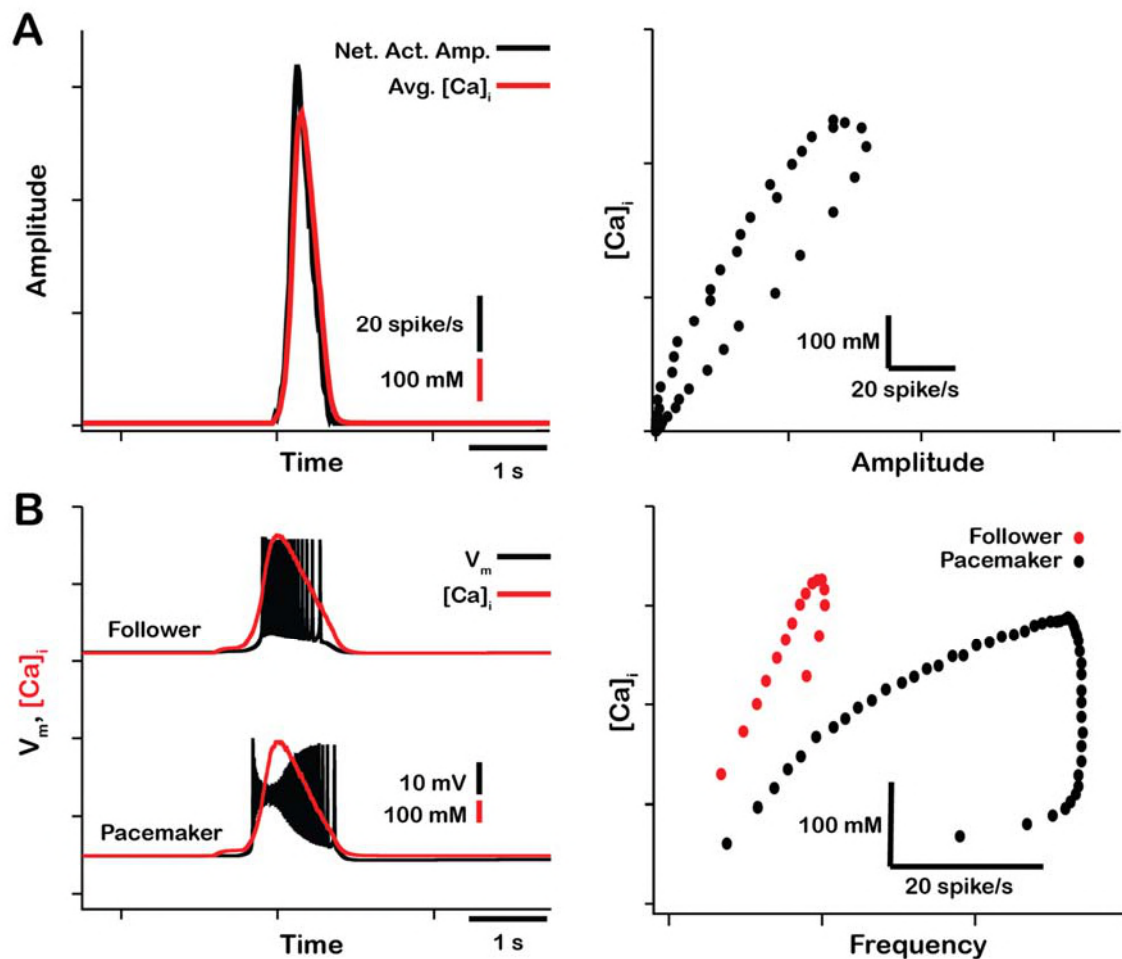

376

377 **Figure 10** Correlations between network and neuronal spiking activity and intracellular calcium influx. **A)**  
 378 Comparison of network activity amplitude and the average intracellular calcium concentration across a single  
 379 network burst (left). Network activity amplitude and the average network intracellular calcium concentration are  
 380 highly correlated (right). **B)** Comparison of spiking frequency and intracellular calcium concentration for a single  
 381 burst in a typical follower and pacemaker neuron (left). Spiking frequency is highly correlated with the  
 382 intracellular calcium transient in follower neurons (right, red). In the pacemaker neuron calcium influx occurs  
 383 after spiking is initiated, consequently the correlation between spiking frequency and the intracellular calcium  
 384 concentration is poor at the beginning of the bursts (right, black). The network parameters used are:  $\bar{g}_{Ca} =$   
 385  $0.00175$  (nS),  $P_{Ca} = 0.0275$ ,  $P_{Syn} = 0.05$  and  $W_{max} = 0.096$  (nS).

386

### 387 Low Network Connection Probability Increases the Variability of the $\Delta[Ca]_i$ in 388 Individual Neurons During $I_{CAN}$ Blockade

389 In our model, synaptically mediated calcium influx into the cell is proportional to the  
 390 total synaptic current through its membrane. The synaptic current is determined by the number  
 391 of synapses, the strength of the connections (synaptic weights) and the firing rates of the pre-

392 synaptic neurons. The synaptic connection probability ( $P_{Syn}$ ) together with the total number of  
393 neurons in the network determines the average number of connections each neuron receives.  
394 We examined the relationship between connection probability and the change in  $[Ca]_i$  during  
395 simulated  $I_{CAN}$  blockade (Fig. 11). We found that the  $P_{Syn}$  has no effect on the relationship  
396 between amplitude, frequency or calcium transients at the network level provided that the  
397 synaptic strength remains constant ( $N \cdot P_{Syn} \cdot \frac{1}{2}W_{max} = const$ ) (Fig. 11A, B). Additionally,  
398 regardless of  $P_{Syn}$ , the network activity amplitude and average intracellular calcium  
399 concentration are highly correlated.  $P_{Syn}$  does however affects the change in the peak  $[Ca]_i$  in  
400 individual neurons. In a network with a high connection probability ( $P_{Syn} = 1$ ) the synaptic  
401 current/calcium transient is nearly identical for all neurons and therefore the change in  $[Ca]_i$   
402 during  $I_{CAN}$  blockade is approximately the same for each neuron (Fig. 11C). In a sparsely  
403 connected network the synaptic current and calcium influx are more variable and reflect the  
404 heterogeneity in spiking frequency of the pre-synaptic neurons (Fig. 11D). Interestingly, in a  
405 network with low connection probability ( $P_{Syn} < 0.1$ ), the peak  $[Ca]_i$  transient in some  
406 neurons increases when  $I_{CAN}$  is blocked (Fig. 11E).  
407

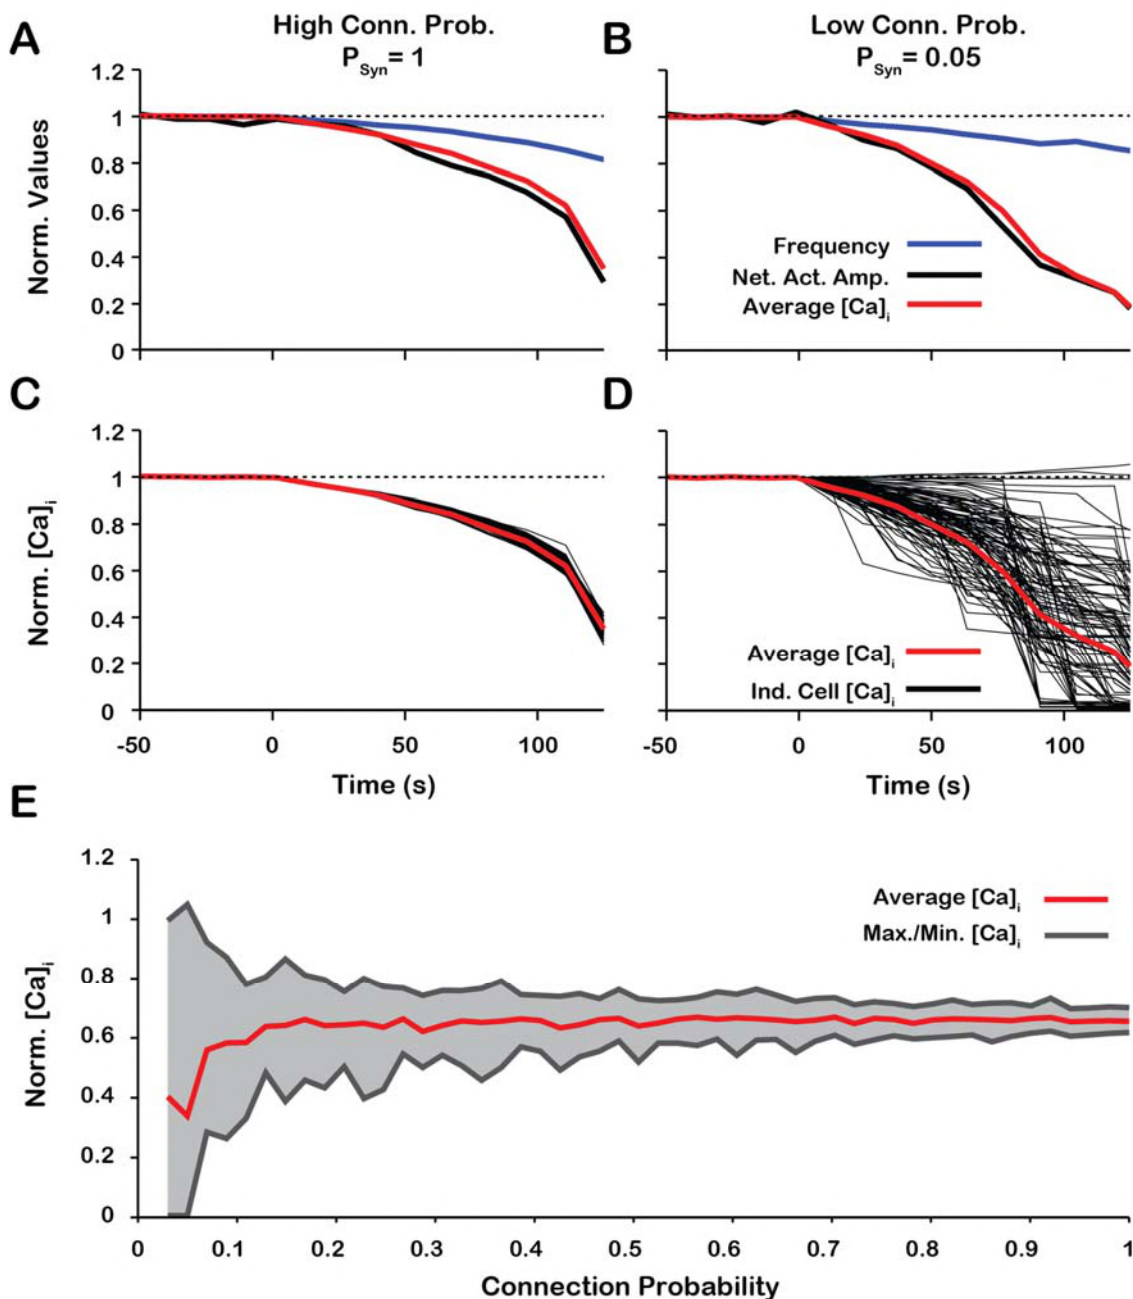

408

409 **Figure 11** Low network connection probability increases the variability of changes in the peak  $[Ca]_i$  in individual  
 410 neurons during  $I_{CAN}$  blockade. (A & B) Effect of  $I_{CAN}$  blockade on network activity amplitude, network calcium  
 411 amplitude and frequency for network connection probabilities A)  $P = 1$  and B)  $P = 0.05$ . (C & D) Effect of  $I_{CAN}$   
 412 blockade on changes in the magnitude of peak cellular calcium transients for network connection probabilities C)  
 413  $P_{Syn} = 1$  and D)  $P_{Syn} = 0.05$ . E) Maximum, minimum and average change in the peak intracellular calcium  
 414 transient of individual neurons as a function of synaptic connection probability. All curves in A through E are  
 415 normalized to their baseline values. Synaptic weight was adjusted to keep the average synaptic strength ( $N \cdot P_{Syn} \cdot$   
 416  $\frac{1}{2}W_{max} = const$ ) constant. Notice that lowering the synaptic connection probability increases the variability in the  
 417 peak intracellular calcium concentration during  $I_{CAN}$  blockade. Interestingly, for connection probabilities below

418 approximately 5%, blocking  $\bar{g}_{CAN}$  can increase the peak calcium transient in a small subset of neurons. The  
419 network parameters used are:  $\bar{g}_{Ca} = 0.00175$  ( $nS$ ) and  $P_{Ca} = 0.0275$  and  $W_{max} = var$ .

420

## 421 **4. Discussion**

422 Establishing cellular and circuit mechanisms generating the rhythm and amplitude of  
423 respiratory oscillations in the mammalian brainstem pre-BötC has remained an unsolved  
424 problem of wide-spread interest in neurophysiology since this structure, essential for breathing  
425 to support mammalian life, was discovered nearly three decades ago (Smith et al., 1991). Our  
426 objective in this theoretical study was to re-examine and further define contributions of two of  
427 the main currently proposed neuronal biophysical mechanisms operating in pre-BötC  
428 excitatory circuits, specifically mechanisms involving  $I_{CAN}$  activated by neuronal calcium  
429 fluxes and voltage-dependent  $I_{NaP}$  in the circuit neurons. While these sodium- and calcium-  
430 based mechanisms have been studied extensively over the past two-decades and shown  
431 experimentally to be integrated in pre-BötC circuits, their actual roles in circuit operation are  
432 continuously debated and unresolved. Both mechanisms have been proposed to be  
433 fundamentally involved in rhythm generation either separately or in combination, as plausibly  
434 shown from previous theoretical modeling studies. Furthermore, the process of rhythm  
435 generation in pre-BötC circuits must be associated with an amplitude of excitatory circuit  
436 activity sufficient to drive downstream circuits to produce adequate respiratory motor output.  
437 Biophysical mechanisms involved in generating excitatory population activity amplitude have  
438 also not been established. Our analysis is motivated by the recent experimental observations  
439 obtained from neonatal rodent slices isolating pre-BötC circuits in vitro that inhibition of the  
440 endogenously active  $I_{CAN}/TRPM4$  strongly reduces the amplitude of network oscillations  
441 within pre-BötC circuits but have little effect on oscillation frequency (Koizumi et al., 2018).  
442 This is contrary to the proposed  $I_{CAN}$ -based models for rhythm generation in the isolated pre-  
443 BötC and indicates a fundamentally different functional organization of pre-BötC circuits, in  
444 terms of oscillatory frequency and amplitude generation, that needs to be defined.

445 We accordingly analyzed the role of  $I_{CAN}$  and possible sources of intracellular calcium  
446 transients activating this conductance and found that the effect of simulated  $I_{CAN}$  blockade on  
447 amplitude and frequency is highly dependent on the source(s) of intracellular calcium, which  
448 is also a central issue to be resolved. In the case where  $Ca_{syn}$  is the primary intracellular  
449 calcium source,  $I_{CAN}$  blockade generates a large reduction in network activity amplitude. In  
450 contrast, when  $Ca_V$  is the only intracellular calcium source,  $I_{CAN}$  blockade has little effect on  
451 network activity amplitude and primarily affects the population bursting frequency that is

452 caused by decreased excitability. Additionally, we show that activation of  $I_{CAN}$  by  $Ca_{Syn}$   
453 functions as a mechanism to augment the inspiratory drive potential and amplitude of  
454 population activity, and that this effect is similar to increasing the synaptic coupling strength  
455 within the network. Therefore, in the case of  $Ca_{Syn}$ , blockade of  $I_{CAN}$  reduces the inspiratory  
456 drive potential causing de-recruitment of non-rhythmogenic follower neurons and reduction of  
457 network activity amplitude. In a model where  $I_{CAN}$  is activated by both  $Ca_V$  and  $Ca_{Syn}$  with  
458 contributions of 5% and 95% respectively, we show that simulated blockade of  $I_{CAN}$  generates  
459 a large reduction in network population activity amplitude and a slight decrease in frequency.  
460 This closely reproduces experimental blockade of  $I_{CAN}$ /TRPM4 by either 9-phenanthrol or FFA  
461 (Fig. 7). Finally, we showed that the change in the peak calcium transients for individual  
462 neurons during  $I_{CAN}$  blockade match experimental data particularly at relatively low connection  
463 probabilities ( $P_{Syn} \sim < 0.1$ ).

464

#### 465 **Role of $I_{CAN}$ in the pre-BötC Respiratory Network**

466 The hypothesis that  $I_{CAN}$  is involved in generation of the inspiratory rhythm is based on  
467 experimental observations from in vitro mouse medullary slice preparations (Pena et al., 2004;  
468 Thoby-Brisson & Ramirez, 2001), and in silico modeling studies (Jasinski et al., 2013; Rubin,  
469 Hayes, et al., 2009; Toporikova & Butera, 2011). Theories of  $I_{CAN}$ -dependent bursting rely on  
470 intracellular  $Ca^{2+}$  signaling mechanisms that have not been well defined.

471 Two models of  $I_{CAN}$ -dependent rhythmic bursting in vitro have been proposed and are  
472 referred to as the “dual pacemaker” and “group pacemaker” models. In the dual pacemaker  
473 model, two types of pacemaker neurons are proposed that are either  $I_{NaP}$ -dependent (riluzole  
474 sensitive) or  $I_{CAN}$ -dependent ( $Ca^{2+}$  sensitive) intrinsic bursters (see Rybak et al., 2014 for  
475 review). In this model network, oscillations are thought to originate from these pacemaker  
476 neurons which through excitatory synaptic interactions synchronize bursting and drive activity  
477 of follower neurons within the pre-BötC. Although pacemaker neurons sensitive to neuronal  
478  $Ca^{2+}$  flux blockade through  $Ca_V$  have been reported (Pena et al., 2004; Thoby-Brisson &  
479 Ramirez, 2001), the source and mechanism driving intracellular  $Ca^{2+}$  oscillations has not been  
480 described. Computational models of  $I_{CAN}$ -dependent pacemaker neurons rely on controversial  
481 mechanisms for burst initiation and terminations, e.g. IP3-dependent  $Ca^{2+}$  oscillations  
482 (Toporikova & Butera, 2011; Del Negro et al., 2010), that have been questioned from recent  
483 negative experimental results (Beltran-Parrazal et al., 2012; Toporikova et al., 2015).

484 In versions of the “group pacemaker” model (Rubin et al., 2009; Feldman & Del Negro,

485 2006; Del Negro et al., 2010) network oscillations are initiated through recurrent synaptic  
486 excitation that trigger postsynaptic  $Ca^{2+}$  influx. Subsequent  $I_{CAN}$  activation generates  
487 membrane depolarization (inspiratory drive potential) to drive neuronal bursting. Synaptically  
488 triggered  $Ca^{2+}$  influx and the contribution of  $I_{CAN}$  to the inspiratory drive potential of individual  
489 pre-BötC neurons are experimentally supported (Mironov, 2008; Pace et al., 2007), however  
490 the mechanism of burst termination remains unclear. Again, the computational group-  
491 pacemaker models that have been explored (Rubin, et al., 2009) rely on as yet unproven  
492 mechanisms for burst termination, and in some cases lack key biophysical features of the pre-  
493 BötC neurons such as voltage-dependent frequency control and expression of  $I_{NaP}$ .

494 In our model, we showed that blockade of either  $I_{CAN}$  or synaptic interactions produce  
495 qualitatively equivalent effects on network population activity amplitude and frequency when  
496 the calcium transients are primarily generated from synaptic sources (Fig.4). Consequently, our  
497 model predicts that blockade of  $I_{CAN}$  or synaptic interactions in the isolated pre-BötC in vitro  
498 will produce comparable effects on amplitude and frequency. This is the case as Johnson et al.  
499 (1994) showed that gradual blockade of synaptic interactions by low calcium solution  
500 significantly decreases network activity amplitude while having little effect of frequency,  
501 similar to the experiments where the  $I_{CAN}$  channel TRPM4 is blocked with 9-phenanthrol  
502 (Koizumi et al., 2018).

503 Overall, our new model simulations for the isolated pre-BötC excitatory network  
504 suggest that the role of  $I_{CAN}$ /TRPM4 activation is to amplify excitatory synaptic drive in  
505 generating the amplitude of inspiratory population activity, independent of the biophysical  
506 mechanism generating inspiratory rhythm. We note that the recent experiments have also  
507 shown that in the more intact brainstem respiratory network that ordinarily generates patterns  
508 of inspiratory and expiratory activity, endogenous activation of  $I_{CAN}$ /TRPM4 appears to  
509 augment the amplitude of both inspiratory and expiratory population activity, and hence these  
510 channels are fundamentally involved in inspiratory-expiratory pattern formation (Koizumi et  
511 al., 2018).

512

### 513 **Calcium Transients as Correlates of Activity**

514 Neuronal calcium transients can arise from voltage-gated calcium sources, driven by  
515 action potentials, and serve as correlates of neuronal activity. We analyzed the correlation  
516 between calcium transients and inspiratory activity of individual inspiratory neurons as well as  
517 the entire network, particularly since dynamic calcium imaging has been utilized to assess

518 activity of individual and populations of pre-BötC excitatory neurons in vitro during  
519 pharmacological inhibition of  $I_{CAN}$ /TRPM4 (Koizumi et al., 2018). In our model, most of the  
520 calcium influx is synaptically-triggered and may occur within a given neuron in the absence of  
521 action potentials. We show that intracellular calcium transients are highly correlated with  
522 network and cellular activity. This is true across individual neuron bursts and when comparing  
523 changes in peak values of neuronal firing and intracellular calcium transients across the  
524 duration of an  $I_{CAN}$  blockade simulation. The correlation at the onset of bursting in pacemaker  
525 neurons are an exception. In these neurons, the correlations between the intracellular calcium  
526 concentration and the instantaneous firing rate across a single burst are not apparent at the onset  
527 of this burst. This is because pacemaker neurons start spiking before the rest of the network,  
528 which precedes synaptically triggered calcium influx.

529         Additionally, we examined the relative change in the peak calcium transients in single  
530 neurons as a function of  $I_{CAN}$  conductance. We show that in a subset of neurons the peak  
531 calcium transient increases with reduced  $I_{CAN}$ . This result is surprising but is supported by the  
532 recent calcium imaging data (Koizumi et al., 2018). This occurs in neurons that receive most  
533 of their synaptic input from pacemaker neurons and our analyses suggest this is possible in  
534 sparse networks, i.e. with relatively low connection probability. In pacemaker neurons,  $I_{CAN}$   
535 blockade leads to a reduction of their excitability resulting in an increased value of  $I_{NaP}$   
536 inactivation gating variable at the burst onset. Thus, during the burst, the peak action potential  
537 frequency and the synaptic output from these neurons is increased with  $I_{CAN}$  blockade.  
538 Consequently, neurons that receive synaptic input from pacemaker neurons will see an increase  
539 in their peak calcium transients. In most neurons, however, synaptic input is received primarily  
540 from follower neurons. Since  $I_{CAN}$  blockade de-recruits follower neurons, the synaptic input  
541 and subsequent calcium influx in most decreases. Therefore, our model predicts that in a sparse  
542 network, blocking  $I_{CAN}$  results in very diverse responses at the cellular level with overall  
543 tendency to reduce intracellular calcium transients such that the amplitude of these transients  
544 averaged over the entire population decreases during  $I_{CAN}$  blockade while their frequency is  
545 unchanged. This is consistent with the experimental calcium imaging data (Koizumi et al.,  
546 2018).

547

### 548 **Synaptic Calcium Sources**

549         Our model suggests that calcium transients in the pre-BötC are coupled to excitatory  
550 synaptic input, i.e. pre-synaptic glutamate release and binding to post-synaptic glutamate



551 receptors triggers calcium entry. The specific mechanisms behind this process is unclear,  
552 however it is likely dependent on specific types of ionotropic or metabotropic glutamate  
553 receptors.

554 There are three subtypes of ionotropic glutamate receptors, N-methyl-D-aspartate  
555 (NMDA), Kainate (KAR), and  $\alpha$ -amino-3-hydroxy-5-methyl-4-isoxazolepropionic acid  
556 (AMPA), all of which are expressed in the pre-BötC (Paarmann, Frermann, Keller, &  
557 Hollmann, 2000) and have varying degrees of calcium permeability. NMDA and AMPA are  
558 unlikely candidates for direct involvement in synaptically mediated calcium influx in the pre-  
559 BötC. Pharmacological blockade of NMDA receptors has no significant effect on the amplitude  
560 or frequency of XII motor output (Morgado-Valle & Feldman, 2007; Pace et al., 2007) and  
561 AMPA receptors in the pre-BötC show high expression of the subunit GluR2, which renders  
562 the AMPA ion channel pore impermeable to  $\text{Ca}^{2+}$  (Paarmann et al., 2000). It is possible,  
563 however, that AMPA mediated depolarization may trigger calcium influx indirectly through  
564 the voltage-gated calcium channel activation on the post-synaptic terminal. The contribution  
565 of the latter to synaptically triggered calcium influx is likely small as pharmacological blockade  
566 of L-, N- and P/Q-type calcium channels have no significant effect on XII motor output from  
567 the pre-BötC (Morgado-Valle et al., 2008).

568 Calcium permeability through KAR receptors is dependent on subunit expression. The  
569 KAR subunit GluK3 is highly expressed in the pre-BötC (Paarmann et al., 2000) and is calcium  
570 permeable (Perrais et al., 2009) making it a possible candidate for synaptically mediated  
571 calcium entry. Furthermore, GluK3 is insensitive to tonic glutamate release and only activated  
572 by large glutamate transients (Perrais et al., 2009). Consequently, GluK3 may only be activated  
573 when receiving synaptic input from a bursting presynaptic neuron which would presumably  
574 generate large glutamate transients. The role of GluK3 in the pre-BötC has not been  
575 investigated.

576 Metabotropic glutamate receptors (mGluR) indirectly activate ion channels through G-  
577 protein mediated signaling cascades. Group 1 mGluRs which include mGluR1 and mGluR5  
578 are typically located on post-synaptic terminals (Shigemoto et al., 1997) and activation of group  
579 1 mGluRs is commonly associated with calcium influx through calcium permeable channels  
580 (Berg et al., 2007; Endoh, 2004; Mironov, 2008) and calcium release from intracellular calcium  
581 stores (Pace et al., 2007).

582 In the pre-BötC, mGluR1/5 are thought to contribute to calcium influx by triggering the  
583 release of calcium from intracellular stores (Pace et al., 2007) and/or the activation of the  
584 transient receptor potential C3 (TRPC3) channel (Ben-Mabrouk & Tryba, 2010). Blockade of

585 mGluR1/5 reduces the inspiratory drive potential in pre-BötC neurons and reduces XII motor  
586 output (Pace et al., 2007) which is consistent with the effects of  $I_{CAN}$ /TRPM4 blockade (Pace  
587 et al., 2007). TRPC3 is a calcium permeable channel (Thebault et al., 2005) that is associated  
588 with calcium signaling (Hartmann et al., 2011), store-operated calcium entry (Kwan et al.,  
589 2004), and synaptic transmission (Hartmann et al., 2011). TRPC3 is activated by diacylglycerol  
590 (DAG) (Clapham, 2003) which is formed after synaptic activation of mGluR1/5. TRPC3 is  
591 highly expressed in the pre-BötC and was hypothesized to underlie  $I_{CAN}$  activation in the pre-  
592 BötC (Ben-Mabrouk & Tryba, 2010) and other brain regions (Amaral & Pozzo-Miller, 2007;  
593 Zitt et al., 1997). Furthermore, TRPC3 and  $I_{CAN}$  have been shown to underlie slow excitatory  
594 post synaptic current (sEPSC) (Hartmann et al., 2008; Hartmann et al., 2011). This is consistent  
595 with our model since  $I_{CAN}$  activation is dependent on synaptically triggered calcium entry, and  
596 the calcium dynamics are slower than the fast AMPA based current  $I_{Syn}$ . Therefore, in our  
597 model,  $I_{CAN}$  decays relatively slowly and, hence, can be treated as a sEPSC.

598 In the pre-BötC, the effect of TRPC3 blockade by 3-pyrazole on network amplitude is  
599 remarkably similar to blockade of TRPM4 (Koizumi et al., 2018). This suggests that the  
600  $I_{CAN}$ /TRPM4 activation may be dependent on/coupled to TRPC3. A possible explanation is  
601 that TRPC3 mediates synaptically-triggered calcium entry. It is also likely that TRPC3 plays a  
602 role in maintaining background calcium concentration levels. We tested this hypothesis by  
603 simulating the blockade of synaptically-triggered calcium influx while simultaneously  
604 lowering the background calcium concentration (Fig. 12). These simulations generated large  
605 reductions in activity amplitude with no effect on frequency which are consistent with data  
606 from experiments where TRPC3 is blocked using 3-pyrazole (Koizumi et al., 2018). This  
607 indirectly suggests that TRPC3 is critical for synaptically-triggered calcium entry and  
608 subsequent  $I_{CAN}$  activation.

609

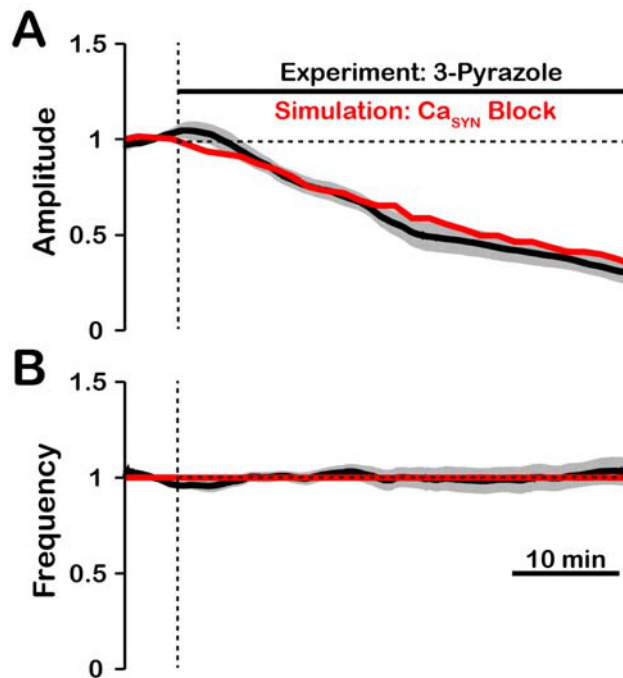

610

611 **Figure 12** Comparison of experimental (black) and simulated (red) TRPC3 blockade (by  $Ca_{syn}$  block) on network  
 612 activity amplitude (A) and frequency (B). Simulated and experimental blockade begins at the vertical dashed line.  
 613 The black line represents the mean and the gray band represents the mean S.E.M. of experimental [XII] output  
 614 recorded from neonatal rat brainstem slices in vitro, reproduced from Koizumi et al., 2018. Blockade was  
 615 simulated by exponential decay of  $P_{Ca}$  with the following parameters: 3-Pyrazole:  $\gamma_{Block} = 1.0$ ,  $\tau_{Block} = 522.5s$ .  
 616 The network parameters are:  $\bar{g}_{Ca} = 0.00175$  (nS),  $P_{Ca} = 0.0275$ ,  $P_{syn} = 0.05$  and  $W_{max} = 0.096$  (nS).

617

### 618 $I_{NaP}$ -dependent Rhythmogenic Kernel

619  $I_{NaP}$  is a conductance present ubiquitously in pre-BötC inspiratory neurons, and is  
 620 established to underlie intrinsic oscillatory neuronal bursting in the absence of excitatory  
 621 synaptic interactions in neurons with sufficiently high  $I_{NaP}$  conductance densities (Koizumi &  
 622 Smith, 2008; Koizumi et al., 2008). Accordingly, we randomly incorporated this conductance  
 623 in our model excitatory neurons from a uniform statistical distribution to produce heterogeneity  
 624 in  $I_{NaP}$  conductance density across the population. Our simulations indicate that the circuit  
 625 neurons mostly with relatively high  $I_{NaP}$  conductance values underlie rhythm generation and  
 626 remain active after complete blockade of  $I_{CAN}$  in our model network, thus forming a  $I_{NaP}$ -  
 627 dependent rhythmogenic kernel, including some neurons with intrinsic oscillatory bursting  
 628 behavior when synaptically uncoupled.

629

Recently it has become apparent that there is functional heterogeneity within pre-BötC  
 630 excitatory circuits, including distinct subpopulations of neurons involved in generating  
 631 periodic sighs (Toporikova et al., 2015; Li et al., 2016), and the subpopulations generating  
 632 regular inspiratory activity. Activity of both of these subpopulations in the pre-BötC isolated

633 in vitro is proposed to be dependent on activation of  $I_{NaP}$  (Toporikova et al., 2015). Our  
634 experimental and modeling results suggest that within the normal inspiratory population, there  
635 are subpopulations distinguished by their role in rhythm versus amplitude generation due to  
636 biophysical properties: there is a  $I_{CAN}/TRPM4$ -dependent recruitable population of excitatory  
637 neurons for burst amplitude generation and the  $I_{NaP}$ -dependent rhythmogenic kernel  
638 population. The spatial arrangements of these two synaptically connected excitatory  
639 populations within the pre-BötC are currently unknown, and it remains an important  
640 experimental problem to identify the cells constituting the rhythmogenic kernel and their  
641 biophysical properties. This should now be possible, since our analysis and experimental  
642 results suggest that the rhythmically active neurons of the kernel population can be revealed  
643 and studied after pharmacologically inhibiting the  $I_{CAN}/TRPM4$ -dependent inspiratory burst-  
644 generating population.

645 Recently a “burstlet theory” for emergent network rhythms has been proposed to  
646 account for inspiratory rhythm and pattern generation in the isolated pre-BötC in vitro (Kam et  
647 al., 2013; Del Negro et al., 2018). This theory postulates that a subpopulation of excitatory  
648 neurons generating small amplitude oscillations (burstlets) functions as the inspiratory rhythm  
649 generator that drives neurons that generate the larger amplitude, synchronized inspiratory  
650 population bursts. This concept emphasizes that subthreshold neuronal membrane oscillations  
651 need to be considered and that there is a neuronal subpopulation that functions to independently  
652 form the main inspiratory bursts. This is similar to our concept of distinct excitatory  
653 subpopulations generating the rhythm versus the amplitude of inspiratory oscillations.  
654 Biophysical mechanisms generating rhythmic burstlets and the large amplitude inspiratory  
655 population bursts in the burstlet theory are unknown. We have identified a major  $Ca^{2+}$ -  
656 dependent conductance mechanism for inspiratory burst amplitude (pattern) generation and  
657 show theoretically how this mechanism may be coupled to excitatory synaptic interactions and  
658 is independent of the rhythm-generating mechanism. We also note that a basic property of  $I_{NaP}$   
659 is its ability to generate subthreshold oscillations and promote burst synchronization (Butera et  
660 al., 1999b; Bacak et al., 2016). However, in contrast to our proposal for the mechanisms  
661 operating in the kernel rhythm-generating subpopulation,  $I_{NaP}$  with its favorable voltage-  
662 dependent and kinetic autorhythmic properties— is not proposed to be a basic biophysical  
663 mechanism for rhythm generation in the burstlet theory (Del Negro et al., 2018).

664 We emphasize that the above discussions regarding the role of  $I_{NaP}$  pertain to the  
665 isolated pre-BötC including in more mature rodent experimental preparations in situ where

666 inspiratory rhythm generation has also been shown to be dependent on  $I_{NaP}$  (Smith et al., 2007).  
667 The analysis is more complex when the pre-BötC is embedded within interacting respiratory  
668 circuits in the intact nervous system generating the full complement of inspiratory and  
669 expiratory phase activity, where rhythmogenesis is tightly controlled by inhibitory circuit  
670 interactions and the contribution of  $I_{NaP}$  kinetic properties alone in setting the timing of  
671 inspiratory oscillations is diminished (Smith et al., 2007; Rubin et al., 2009; Richter & Smith,  
672 2014).

673

## 674 **Conclusions**

675 Based on our new data-driven computational model, distinct biophysical mechanisms are  
676 involved in generating the rhythm and amplitude of inspiratory oscillations in the isolated pre-  
677 BötC excitatory circuits. Inspiratory rhythm generation arises from a group of  $I_{NaP}$ -dependent  
678 excitatory neurons, including cells with intrinsic oscillatory bursting properties, that form a  
679 rhythmogenic kernel. Rhythmic synaptic drive from these neurons triggers post-synaptic  
680 calcium transients,  $I_{CAN}$  activation, and subsequent membrane depolarization which drives  
681 bursting in the population of non-rhythmogenic follower neurons. We showed that activation  
682 of  $I_{CAN}$  by synaptically-driven calcium influx functions as a mechanism that amplifies the  
683 excitatory synaptic input to generate the inspiratory drive potential and population activity  
684 amplitude in these non-rhythmogenic neurons. Consequently, blockade of  $I_{CAN}$  causes a robust  
685 decrease in overall network activity amplitude via de-recruitment of these follower neurons  
686 without perturbations of the inspiratory rhythm, which is consistent with the results with  
687 experimental blockade of  $I_{CAN}$ /TRPM4 channels. Our model provides a theoretical explanation  
688 for these recent paradigm-shifting experimental results that  $I_{CAN}$  is not fundamentally involved  
689 in generating the inspiratory rhythm and gives new insights into the functional operation of  
690 pre-BötC excitatory circuits.

691

692

## 693 **Materials and Methods**

### 694 **Model Description**

695 The model describes a network of  $N = 100$  synaptically coupled excitatory neurons. Simulated  
696 neurons are comprised of a single compartment described using a Hodgkin Huxley formalism.  
697 For each neuron, the membrane potential  $V_m$  is given by the following current balance equation:

698

699 
$$C_m \frac{dV_m}{dt} + I_{Na} + I_K + I_{Leak} + I_{NaP} + I_{CAN} + I_{Ca} + I_{Syn} = 0$$

700

701 where  $C_m$  is the membrane capacitance,  $I_{Na}$ ,  $I_K$ ,  $I_{Leak}$ ,  $I_{NaP}$ ,  $I_{CAN}$ ,  $I_{Ca}$  and  $I_{Syn}$  are ionic  
 702 currents through sodium, potassium, leak, persistent sodium, calcium activated non-selective  
 703 cation, voltage-gated calcium, and synaptic channels, respectively. Description of these  
 704 currents, synaptic interactions, and parameter values are taken from (Jasinski et al., 2013). The  
 705 channel currents are defined as follows:

706

707 
$$I_{Na} = \bar{g}_{Na} \cdot m_{Na}^3 \cdot h_{Na} \cdot (V_m - E_{Na})$$

708

709 
$$I_K = \bar{g}_K \cdot m_K^4 \cdot (V_m - E_K)$$

710

711 
$$I_{Leak} = \bar{g}_{Leak} \cdot (V_m - E_{Leak})$$

712

713 
$$I_{NaP} = \bar{g}_{NaP} \cdot m_{NaP} \cdot h_{NaP} \cdot (V_m - E_{Na})$$

714

715 
$$I_{CAN} = \bar{g}_{CAN} \cdot m_{CAN} \cdot (V_m - E_{CAN})$$

716

717 
$$I_{Ca} = \bar{g}_{Ca} \cdot m_{Ca} \cdot h_{Ca} \cdot (V_m - E_{Ca})$$

718

719 
$$I_{Syn} = g_{Syn} \cdot (V_m - E_{Syn})$$

720

721 where  $\bar{g}_i$  is the maximum conductance,  $E_i$  is the reversal potential,  $m_i$  and  $h_i$  are voltage  
 722 dependent gating variables for channel activation and inactivation, respectively, and  $i \in$   
 723  $\{Na, K, Leak, NaP, CAN, Ca, Syn\}$ . The parameters  $\bar{g}_i$  and  $E_i$  are given in Table 1.

724 For  $I_{Na}$ ,  $I_K$ ,  $I_{NaP}$ , and  $I_{Ca}$ , the dynamics of voltage-dependent gating variables  $m_i$ , and  $h_i$  are  
 725 defined by the following differential equation:

726

727 
$$\tau_\eta(V) \cdot \frac{d\eta}{dt} = \eta_\infty(V) - \eta; \quad \eta \in \{m_i, h_i\}$$

728

729 where steady state activation/inactivation  $\eta_\infty$  and time constant  $\tau_\eta$  are given by:

730

731 
$$\eta_{\infty}(V) = \left(1 + e^{-(V-V_{\eta_{1/2}})/k_{\eta}}\right)^{-1}$$

732

733 
$$\tau_{\eta}(V) = \tau_{\eta_{max}} / \cosh((V - V_{\tau_{\eta_{1/2}}})/k_{\tau_{\eta}}).$$

734

735 For the voltage-gated potassium channel, steady state activation  $m_{K\infty}(V)$  and time constant  
736  $\tau_{mK}(V)$  are given by:

737 
$$m_{K\infty}(V) = \frac{\alpha_{\infty}(V)}{\alpha_{\infty}(V) + \beta_{\infty}(V)}$$

738

739 
$$\tau_{mK}(V) = 1/(\alpha_{\infty}(V) + \beta_{\infty}(V))$$

740

741 where

742 
$$\alpha_{\infty}(V) = A_{\alpha} \cdot (V + B_{\alpha}) / (1 - \exp(-(V + B_{\alpha})/\kappa_{\alpha}))$$

743

744 
$$\beta_{\infty}(V) = A_{\beta} \cdot \exp(-(V + B_{\beta})/\kappa_{\beta}).$$

745

746 The parameters  $V_{\eta_{1/2}}$ ,  $V_{\tau_{\eta_{1/2}}}$ ,  $\kappa_{\eta}$ ,  $\kappa_{\tau_{\eta}}$ ,  $\tau_{\eta_{max}}$ ,  $A_{\alpha}$ ,  $A_{\beta}$ ,  $B_{\alpha}$ ,  $B_{\beta}$ ,  $\kappa_{\alpha}$ , and  $\kappa_{\beta}$  are given in Table 1.

747  $I_{CAN}$  activation is dependent on the intracellular calcium concentration  $[Ca]_{in}$  and is given by:

748

749 
$$m_{CAN} = 1/(1 + (Ca_{1/2}/[Ca]_{in})^n).$$

750

751 The parameters  $Ca_{1/2}$  and  $n$ , given in Table 1, represent the half-activation calcium  
752 concentration and the Hill Coefficient, respectively.

753 Calcium enters the neurons through voltage-gated calcium channels ( $Ca_V$ ) and/or  
754 synaptic channels ( $Ca_{syn}$ ), where a percentage ( $P_{Ca}$ ) of the synaptic current ( $I_{syn}$ ) is assumed  
755 to consist of  $Ca^{2+}$  ions. A calcium pump removes excess calcium with a time constant  $\tau_{Ca}$  and  
756 sets the minimum calcium concentration  $Ca_{min}$ . The dynamics of  $[Ca]_{in}$  is given by the  
757 following differential equation:

758

759 
$$\frac{d[Ca]_{in}}{dt} = -\alpha_{Ca}(I_{Ca} + P_{Ca} \cdot I_{syn}) - ([Ca]_{in} - Ca_{min})/\tau_{Ca}.$$

760

761 The parameters  $\alpha_{Ca}$  is a conversion factor relating current and rate of change in  $[Ca]_{in}$ , see

762 Table 1 for parameter values.

763 The synaptic conductance of the  $i^{\text{th}}$  neuron ( $g_{syn}^i$ ) in the population is described by the  
 764 following equation:

765

$$766 \quad g_{syn}^i = g_{Tonic} + \sum_{j,n} w_{ji} \cdot C_{ji} \cdot H(t - t_{j,n}) \cdot e^{-(t-t_{j,n})/\tau_{syn}}$$

767

768 where  $w_{ji}$  is the weight of the synaptic connection from cell  $j$  to cell  $i$ ,  $C$  is a connectivity  
 769 matrix ( $C_{ji} = 1$  if neuron  $j$  makes a synapse on neuron  $i$ , and  $C_{ji} = 0$  otherwise),  $H(\cdot)$  is the  
 770 Heaviside step function,  $t$  is time,  $\tau_{syn}$  is the exponential decay constant and  $t_{j,n}$  is the time at  
 771 which an action potential  $n$  is generated in neuron  $j$  and reaches neuron  $i$ .

772

773 **Table 1. Model parameter values.** The channel kinetics, intracellular  $\text{Ca}^{2+}$  dynamics and the  
 774 corresponding parameter values, were derived from previous models (see (Jasinski et al., 2013)  
 775 and the references therein).

776

| Channel    | Parameters                                                                                                                                                                                                                                                                                                                                                                                                                           |
|------------|--------------------------------------------------------------------------------------------------------------------------------------------------------------------------------------------------------------------------------------------------------------------------------------------------------------------------------------------------------------------------------------------------------------------------------------|
| $I_{Na}$   | $\bar{g}_{Na} = 150.0 \text{ nS}$ , $E_{Na} = 55.0 \text{ mV}$ ,<br>$V_{m_{1/2}} = -43.8 \text{ mV}$ , $k_m = 6.0 \text{ mV}$ ,<br>$V_{\tau_{m_{1/2}}} = -43.8 \text{ mV}$ , $k_{\tau_m} = 14.0 \text{ mV}$ , $\tau_{m_{max}} = 0.25 \text{ ms}$ ,<br>$V_{h_{1/2}} = -67.5 \text{ mV}$ , $k_h = -10.8 \text{ mV}$ ,<br>$V_{\tau_{h_{1/2}}} = -67.5 \text{ mV}$ , $k_{\tau_h} = 12.8 \text{ mV}$ , $\tau_{h_{max}} = 8.46 \text{ ms}$ |
| $I_K$      | $\bar{g}_K = 160.0 \text{ nS}$ , $E_K = -94.0 \text{ mV}$ ,<br>$A_\alpha = 0.01$ , $B_\alpha = 44.0 \text{ mV}$ , $\kappa_\alpha = 5.0 \text{ mV}$<br>$A_\beta = 0.17$ , $B_\beta = 49.0 \text{ mV}$ , $\kappa_\beta = 40.0 \text{ mV}$                                                                                                                                                                                              |
| $I_{Leak}$ | $\bar{g}_{Leak} = 2.5 \text{ nS}$ , $E_{Leak} = -68.0 \text{ mV}$ ,                                                                                                                                                                                                                                                                                                                                                                  |
| $I_{NaP}$  | $\bar{g}_{NaP} \in [0.0, 5.0] \text{ nS}$ ,<br>$V_{m_{1/2}} = -47.1 \text{ mV}$ , $k_m = 3.1 \text{ mV}$ ,<br>$V_{\tau_{m_{1/2}}} = -47.1 \text{ mV}$ , $k_{\tau_m} = 6.2 \text{ mV}$ , $\tau_{m_{max}} = 1.0 \text{ ms}$ ,<br>$V_{h_{1/2}} = -60.0 \text{ mV}$ , $k_h = -9.0 \text{ mV}$ ,<br>$V_{\tau_{h_{1/2}}} = -60.0 \text{ mV}$ , $k_{\tau_h} = 9.0 \text{ mV}$ , $\tau_{h_{max}} = 5000 \text{ ms}$                          |



|           |                                                                                                                                                                                                                                                                                                                                                                                                                        |
|-----------|------------------------------------------------------------------------------------------------------------------------------------------------------------------------------------------------------------------------------------------------------------------------------------------------------------------------------------------------------------------------------------------------------------------------|
| $I_{CAN}$ | $\bar{g}_{CAN} = 1.0 \text{ nS}, E_{CAN} = 0.0 \text{ mV},$<br>$Ca_{1/2} = 0.00074 \text{ mM}, n = 0.97$                                                                                                                                                                                                                                                                                                               |
| $I_{Ca}$  | $\bar{g}_{Ca} = 0.01 \text{ nS}, E_{Ca} = R \cdot T / F \cdot \ln([Ca]_{out} / [Ca]_{in}),$<br>$R = 8.314 \text{ J} / (\text{mol} \cdot \text{K}), T = 308.0 \text{ K},$<br>$F = 96.485 \text{ kC} / \text{mol}, [Ca]_{out} = 4.0 \text{ mM}$<br>$V_{m_{1/2}} = -27.5 \text{ mV}, k_m = 5.7 \text{ mV}, \tau_m = 0.5 \text{ ms},$<br>$V_{h_{1/2}} = -52.4 \text{ mV}, k_h = -5.2 \text{ mV}, \tau_h = 18.0 \text{ ms}$ |
| $Ca_{in}$ | $\alpha_{Ca} = 2.5 \cdot 10^{-5} \text{ mM} / \text{fC}, P_{Ca} = 0.01, Ca_{min} = 1.0 \cdot 10^{-10} \text{ mM}, \tau_{Ca} = 50.0 \text{ ms}$                                                                                                                                                                                                                                                                         |
| $I_{Syn}$ | $g_{Tonic} = 0.31 \text{ nS}, E_{Syn} = -10.0 \text{ mV}, \tau_{Syn} = 5.0 \text{ ms}$                                                                                                                                                                                                                                                                                                                                 |

777

778 To account for heterogeneity of neuron properties within the network, the persistent sodium  
779 current conductance,  $\bar{g}_{NaP}$ , for each neuron was assigned randomly based on a uniform  
780 distribution over the range  $[0.0, 5.0] \text{ nS}$  which is consistent with experimental measurements  
781 (Rybak et al., 2003; Koizumi & Smith, 2008; Koizumi et al., 2008). The weight of each  
782 synaptic connection was uniformly distributed over the range  $w_{ji} \in [0, W_{max}]$  where  $W_{max}$   
783 ranged from 0.0 to 1.0  $\text{nS}$  depending on the network connectivity and specific simulation. The  
784 elements of the network connectivity matrix,  $C_{ji}$ , are randomly assigned values of 0 or 1 such  
785 that the probability of any connection between neuron  $j$  and neuron  $i$  being 1 is equal to the  
786 network connection probability  $P_{Syn}$ . We varied the connection probability over the range  
787  $P_{Syn} \in [0.05, 1.0]$ , however, a value of  $P_{Syn} = 0.05$  was used in most simulations.

788

### 789 **Data Analysis and Definitions**

790 The time of an action potential was defined as when the membrane potential of a neuron  
791 crosses  $-35 \text{ mV}$  in a positive direction. The network activity amplitude and frequency were  
792 determined by identifying peaks and calculating the inverse of the interpeak interval in  
793 histograms of network spiking. Network histograms of the population activity were calculated  
794 as the number of action potentials generated by all neurons per 50  $\text{ms}$  bin per neuron with units  
795 of  $\text{spikes/s}$ . The number of recruited neurons is defined as the peak number of neurons that  
796 spiked at least once per bin during a network burst. The average spike frequency of recruited  
797 neurons is defined as the number of action potentials per bin per recruited neuron with units of  
798  $\text{spikes/s}$ . The average network resting membrane potential was defined as the average  
799 minimum value of  $V_m$  in a 500  $\text{ms}$  window following a network burst. The average inactivation  
800 of the persistent sodium current at the start of each burst was defined by the maximum of the

801 average value of  $h_{NaP}$  in a 500 ms window before the peak of each network burst. The average  
802 inactivation of the persistent sodium current at the end of each burst was defined by the  
803 maximum of the average value of  $h_{NaP}$  in a 500 ms window after the peak of each network  
804 burst. Synaptic strength is defined as the number of neurons in the network multiplied by the  
805 connection probability multiplied by the average weight of synaptic connections ( $N \cdot P_{Syn} \cdot$   
806  $\frac{1}{2}W_{max}$ ). Pacemaker neurons were defined as neurons that continue bursting intrinsically after  
807 complete synaptic blockade. Follower neurons were defined as neurons that become silent after  
808 complete synaptic blockade. The inspiratory drive potential is defined as the envelope of  
809 depolarization that occurs in neurons during the inspiratory phase of the network oscillations  
810 (Morgado-Valle et al. 2008).

811

### 812 **Characterization $I_{CAN}$ in regulating network activity amplitude and frequency in $Ca_V$** 813 **and $Ca_{Syn}$ Models**

814 To characterize the role of  $I_{CAN}$  in regulation of network activity amplitude and  
815 frequency we slowly increased the conductance ( $\bar{g}_{CAN}$ ) in our simulations from zero until the  
816 network transitioned from a rhythmic bursting to a tonic (non-bursting) firing regime. To  
817 ensure that the effect(s) are robust, these simulations were repeated over a wide range of  
818 synaptic weights, synaptic connection probabilities, and strengths of the intracellular calcium  
819 transients from  $Ca_V$  or  $Ca_{Syn}$  sources. Changes in network activity amplitude were further  
820 examined by plotting the number of recruited neurons and the average action potential  
821 frequency of recruited neurons versus  $\bar{g}_{CAN}$ .

822

### 823 **Simulated Pharmacological Manipulations**

824 In simulations that are compared with experimental data, both  $Ca_V$  and  $Ca_{Syn}$  calcium  
825 sources are included. Pharmacological blockade of  $I_{CAN}$  was simulated by varying the  
826 conductance,  $\bar{g}_{CAN}$  according to a decaying exponential function

$$827 \quad \bar{g}_{CAN}(t) = g_{CAN}^{max} - \gamma_{block} \cdot (1 - e^{-t/\tau_{block}}).$$

828 The percent block  $\gamma_{block}$ , decay constant  $\tau_{block}$  and the maximum  $I_{CAN}$  conductance  $g_{CAN}^{max}$   
829 were adjusted to match the experimental changes in network amplitude. The synaptic weight  
830 of the network was chosen such that at  $\bar{g}_{CAN} = 0$  the network activity amplitude was close to  
831 20% of maximum. To reduce the computational time, the duration of  $I_{CAN}$  block simulations  
832 was one tenth of the total of experimental durations. For comparison, the plots of normalized  
833 change in amplitude and frequency of the simulations were stretched over the same time-period

834 as experimental data. Increasing the simulation time had no effect on our results (data not  
835 shown).

836

### 837 **Comparison with Calcium Imaging Data**

838 To allow comparisons with network and cellular calcium imaging data, we analyzed rhythmic  
839 calcium transients from our simulations. Single cell calcium signals are represented by  $[Ca]_i$ .  
840 The network calcium signal was calculated as the average intracellular calcium concentration  
841 in the network ( $\sum_1^N [Ca]_i/N$ ).

842

### 843 **Integration Methods**

844 All simulations were performed locally on an 8-core Linux-based operating system or on the  
845 high-performance computing cluster Biowulf at the National Institutes of Health. Simulation  
846 software was custom written in C++. Numerical integration was performed using the  
847 exponential Euler method with a fixed step-size ( $\Delta t$ ) of  $0.025ms$ . In all simulations, the first  
848 50 s of simulation time was discarded to allow for the decay of any initial condition-dependent  
849 transients.

850

851

852

## 853 **5. Acknowledgments**

854 This work was supported in part by the Jayne Koskinas Ted Giovanis Foundation for  
855 Health and Policy, the Intramural Research Program of the National Institutes of Health (NIH),  
856 National Institute of Neurological Disorders and Stroke, and NIH Grants R01 AT008632 and  
857 U01 EB021960.

858

859

## 860 **6. Bibliography**

861 Amaral, M. D., & Pozzo-Miller, L. (2007). TRPC3 channels are necessary for brain-derived  
862 neurotrophic factor to activate a nonselective cationic current and to induce dendritic  
863 spine formation. *J Neurosci*, 27(19), 5179-5189. doi:10.1523/JNEUROSCI.5499-  
864 06.2007

865 Bacak, B. J., Kim, T., Smith, J. C., Rubin, J. E., & Rybak, I. A. (2016). Mixed-mode oscillations  
866 and population bursting in the pre-Botzinger complex. *Elife*, 5, e13403.

- 867 doi:10.7554/eLife.13403
- 868 Beltran-Parrazal, L., Fernandez-Ruiz, J., Toledo, R., Manzo, J., & Morgado-Valle, C. (2012).  
869 Inhibition of endoplasmic reticulum Ca(2)(+) ATPase in preBotzinger complex of  
870 neonatal rat does not affect respiratory rhythm generation. *Neuroscience*, 224, 116-124.  
871 doi:10.1016/j.neuroscience.2012.08.016
- 872 Ben-Mabrouk, F., & Tryba, A. K. (2010). Substance P modulation of TRPC3/7 channels  
873 improves respiratory rhythm regularity and ICAN-dependent pacemaker activity.  
874 *European Journal of Neuroscience*, 31(7), 1219-1232. doi:10.1111/j.1460-  
875 9568.2010.07156.x
- 876 Berg, A. P., Sen, N., & Bayliss, D. A. (2007). TrpC3/C7 and Slo2.1 are molecular targets for  
877 metabotropic glutamate receptor signaling in rat striatal cholinergic interneurons. *J*  
878 *Neurosci*, 27(33), 8845-8856. doi:10.1523/JNEUROSCI.0551-07.2007
- 879 Butera, R. J., Rinzel, J., & Smith, J. C. (1999a). Models of respiratory rhythm generation in the  
880 pre-Botzinger complex. I. Bursting pacemaker neurons. *Journal of Neurophysiology*,  
881 82(1), 382-397. doi:10.1152/jn.1999.82.1.382
- 882 Butera, R. J., Rinzel, J., & Smith, J. C. (1999b). Models of respiratory rhythm generation in  
883 the pre-Botzinger complex. II. Populations of coupled pacemaker neurons. *Journal of*  
884 *Neurophysiology*, 82(1), 398-415. doi:10.1152/jn.1999.82.1.398
- 885 Buzsaki, G. (2006). *Rhythms of the Brain*: Oxford University Press.
- 886 Clapham, D. E. (2003). TRP channels as cellular sensors. *Nature*, 426(6966), 517-524.  
887 doi:10.1038/nature02196
- 888 Del Negro, C. A., Funk, G. D., & Feldman, J. L. (2018). Breathing matters. *Nature Reviews*  
889 *Neuroscience*. doi:10.1038/s41583-018-0003-6
- 890 Del Negro, C. A., Hayes, J. A., Pace, R. W., Brush, B. R., Teruyama, R., & Feldman, J. L.  
891 (2010). Synaptically activated burst-generating conductances may underlie a group-  
892 pacemaker mechanism for respiratory rhythm generation in mammals. *Prog Brain Res*,  
893 187, 111-136. doi:10.1016/B978-0-444-53613-6.00008-3
- 894 Endoh, T. (2004). Characterization of modulatory effects of postsynaptic metabotropic  
895 glutamate receptors on calcium currents in rat nucleus tractus solitarius. *Brain Res*,  
896 1024(1-2), 212-224. doi:10.1016/j.brainres.2004.07.074
- 897 Feldman, J. L., & Del Negro, C. A. (2006). Looking for inspiration: new perspectives on  
898 respiratory rhythm. *Nature Reviews Neuroscience*, 7(3), 232-242. doi:Doi  
899 10.1038/Nrn1871
- 900 Grillner, S. (2006). Biological pattern generation: the cellular and computational logic of

- 901 networks in motion. *Neuron*, 52(5), 751-766. doi:S0896-6273(06)00902-0 [pii]  
902 10.1016/j.neuron.2006.11.008
- 903 Guinamard, R., Demion, M., & Launay, P. (2010). Physiological roles of the TRPM4 channel  
904 extracted from background currents. *Physiology (Bethesda)*, 25(3), 155-164.  
905 doi:10.1152/physiol.00004.2010
- 906 Hartmann, J., Dragicevic, E., Adelsberger, H., Henning, H. A., Sumser, M., Abramowitz, J.,  
907 Blum, R., Dietrich, A., Freichel, M., Flockerzi, V., Birnbaumer, L., & Konnerth, A.  
908 (2008). TRPC3 channels are required for synaptic transmission and motor coordination.  
909 *Neuron*, 59(3), 392-398. doi:10.1016/j.neuron.2008.06.009
- 910 Hartmann, J., Henning, H. A., & Konnerth, A. (2011). mGluR1/TRPC3-mediated Synaptic  
911 Transmission and Calcium Signaling in Mammalian Central Neurons. *Cold Spring  
912 Harb Perspect Biol*, 3(4). doi:10.1101/cshperspect.a006726
- 913 Jasinski, P. E., Molkov, Y. I., Shevtsova, N. A., Smith, J. C., & Rybak, I. A. (2013). Sodium  
914 and calcium mechanisms of rhythmic bursting in excitatory neural networks of the pre-  
915 Botzinger complex: a computational modelling study. *European Journal of  
916 Neuroscience*, 37(2), 212-230. doi:10.1111/ejn.12042
- 917 Johnson, S. M., Smith, J. C., Funk, G. D., & Feldman, J. L. (1994). Pacemaker behavior of  
918 respiratory neurons in medullary slices from neonatal rat. *J Neurophysiol*, 72(6), 2598-  
919 2608. doi:10.1152/jn.1994.72.6.2598
- 920 Kam, K., Worrell, J. W., Ventalon, C., Emiliani, V., & Feldman, J. L. (2013). Emergence of  
921 population bursts from simultaneous activation of small subsets of preBotzinger  
922 complex inspiratory neurons. *J Neurosci*, 33(8), 3332-3338.  
923 doi:10.1523/JNEUROSCI.4574-12.2013
- 924 Kiehn, O. (2006). Locomotor circuits in the mammalian spinal cord. *Annu Rev Neurosci*, 29,  
925 279-306. doi:10.1146/annurev.neuro.29.051605.112910
- 926 Koizumi, H., John, T. T., Chia, J. X., Tariq, M. F., Phillips, R. S., Mosher, B., Chen, Y.,  
927 Thompson, R., Zhang, R., Koshiya, N., & Smith, J. C. (2018). Transient Receptor  
928 Potential Channels TRPM4 and TRPC3 Critically Contribute to Respiratory Motor  
929 Pattern Formation but not Rhythmogenesis in Rodent Brainstem Circuits. *eneuro*, 5(1).  
930 doi:10.1523/ENEURO.0332-17.2018
- 931 Koizumi, H., & Smith, J. C. (2008). Persistent Na<sup>+</sup> and K<sup>+</sup>-dominated leak currents contribute  
932 to respiratory rhythm generation in the pre-Botzinger complex in vitro. *J Neurosci*,  
933 28(7), 1773-1785. doi: 10.1523/JNEUROSCI.3916-07.2008
- 934 Koizumi, H., Wilson, C. G., Wong, S., Yamanishi, T., Koshiya, N., & Smith, J. C. (2008).

- 935 Functional imaging, spatial reconstruction, and biophysical analysis of a respiratory  
936 motor circuit isolated in vitro. *J Neurosci*, 28(10), 2353-2365.  
937 doi:10.1523/JNEUROSCI.3553-07.2008
- 938 Kwan, H. Y., Huang, Y., & Yao, X. (2004). Regulation of canonical transient receptor potential  
939 isoform 3 (TRPC3) channel by protein kinase G. *Proc Natl Acad Sci U S A*, 101(8),  
940 2625-2630.
- 941 Li, P., Janczewski, W. A., Yackle, K., Kam, K., Pagliardini, S., Krasnow, M. A., & Feldman,  
942 J. L. (2016). The peptidergic control circuit for sighing. *Nature*, 530(7590), 293-297.  
943 doi:10.1038/nature16964
- 944 Marder, E. & Calabrese, R. (1996). Principles of rhythmic motor pattern generation.  
945 *Physiological Rev.*, 76, 687-717. doi:10.1152/physrev.1996.76.3.687
- 946 Mironov, S. L. (2008). Metabotropic glutamate receptors activate dendritic calcium waves and  
947 TRPM channels which drive rhythmic respiratory patterns in mice. *J Physiol*, 586(9),  
948 2277-2291. doi: 10.1113/jphysiol.2007.149021
- 949 Morgado-Valle, C., Beltran-Parrazal, L., DiFranco, M., Vergara, J. L., & Feldman, J. L. (2008).  
950 Somatic Ca<sup>2+</sup> transients do not contribute to inspiratory drive in preBotzinger Complex  
951 neurons. *J Physiol*, 586(18), 4531-4540. doi:10.1113/jphysiol.2008.154765
- 952 Morgado-Valle, C., & Feldman, J. L. (2007). NMDA receptors in preBotzinger complex  
953 neurons can drive respiratory rhythm independent of AMPA receptors. *J Physiol*,  
954 582(Pt 1), 359-368. doi:10.1113/jphysiol.2007.130617
- 955 Paarmann, I., Frermann, D., Keller, B. U., & Hollmann, M. (2000). Expression of 15 glutamate  
956 receptor subunits and various splice variants in tissue slices and single neurons of  
957 brainstem nuclei and potential functional implications. *J Neurochem*, 74(4), 1335-1345.
- 958 Pace, R. W., Mackay, D. D., Feldman, J. L., & Del Negro, C. A. (2007). Inspiratory bursts in  
959 the preBotzinger complex depend on a calcium-activated non-specific cation current  
960 linked to glutamate receptors in neonatal mice. *J Physiol*, 582(Pt 1), 113-125. doi:  
961 10.1113/jphysiol.2007.133660
- 962 Pena, F., Parkis, M. A., Tryba, A. K., & Ramirez, J. M. (2004). Differential contribution of  
963 pacemaker properties to the generation of respiratory rhythms during normoxia and  
964 hypoxia. *Neuron*, 43(1), 105-117. doi:10.1016/j.neuron.2004.06.023
- 965 Perrais, D., Pinheiro, P. S., Jane, D. E., & Mulle, C. (2009). Antagonism of recombinant and  
966 native GluK3-containing kainate receptors. *Neuropharmacology*, 56(1), 131-140.  
967 doi:10.1016/j.neuropharm.2008.08.002
- 968 Pierrefiche, O., Shevtsova, N. A., St-John, W. M., Paton, J. F., & Rybak, I. A. (2004). Ionic

- 969 currents and endogenous rhythm generation in the pre-Botzinger complex: modelling  
970 and in vitro studies. *Adv Exp Med Biol*, 551, 121-126.
- 971 Ramirez, J. M., Tryba, A. K., & Pena, F. (2004). Pacemaker neurons and neuronal networks:  
972 an integrative view. *Curr Opin Neurobiol*, 14(6), 665-674.  
973 doi:10.1016/j.conb.2004.10.011
- 974 Rekling, J. C., & Feldman, J. L. (1998). PreBotzinger complex and pacemaker neurons:  
975 hypothesized site and kernel for respiratory rhythm generation. *Annu Rev Physiol*, 60,  
976 385-405. doi:10.1146/annurev.physiol.60.1.385
- 977 Richter, D. W., & Smith, J. C. (2014). Respiratory rhythm generation in vivo. *Physiology*  
978 (*Bethesda*), 29(1), 58-71. doi:10.1152/physiol.00035.2013
- 979 Rubin, J. E., Hayes, J. A., Mendenhall, J. L., & Del Negro, C. A. (2009). Calcium-activated  
980 nonspecific cation current and synaptic depression promote network-dependent burst  
981 oscillations. *Proc Natl Acad Sci U S A*, 106(8), 2939-2944. doi:  
982 10.1073/pnas.0808776106
- 983 Rubin, J. E., Shevtsova, N. A., Ermentrout, G. B., Smith, J. C., & Rybak, I. A. (2009). Multiple  
984 Rhythmic States in a Model of the Respiratory Central Pattern Generator. *Journal of*  
985 *Neurophysiology*, 101(4), 2146-2165. doi:DOI 10.1152/jn.90958.2008
- 986 Rybak, I. A., Molkov, Y. I., Jasinski, P. E., Shevtsova, N. A., & Smith, J. C. (2014). Rhythmic  
987 bursting in the pre-Botzinger complex: mechanisms and models. *Prog Brain Res*, 209,  
988 1-23. doi:10.1016/B978-0-444-63274-6.00001-1
- 989 Rybak, I. A., Ptak, K., Shevtsova, N. A., & McCrimmon, D. R. (2003). Sodium currents in  
990 neurons from the rostroventrolateral medulla of the rat. *J Neurophysiol*, 90(3), 1635-  
991 1642. doi:10.1152/jn.00150.2003
- 992 Shigemoto, R., Kinoshita, A., Wada, E., Nomura, S., Ohishi, H., Takada, M., Flor, P. J., Neki,  
993 A., Abe, T., Nakanishi, S., & Mizuno, N. (1997). Differential presynaptic localization  
994 of metabotropic glutamate receptor subtypes in the rat hippocampus. *J Neurosci*,  
995 17(19), 7503-7522.
- 996 Smith, J. C., Abdala, A. P., Borgmann, A., Rybak, I. A., & Paton, J. F. (2013). Brainstem  
997 respiratory networks: building blocks and microcircuits. *Trends Neurosci*, 36(3), 152-  
998 162. doi:10.1016/j.tins.2012.11.004
- 999 Smith, J. C., Abdala, A. P., Koizumi, H., Rybak, I. A., & Paton, J. F. (2007). Spatial and  
1000 functional architecture of the mammalian brain stem respiratory network: a hierarchy  
1001 of three oscillatory mechanisms. *J Neurophysiol*, 98(6), 3370-3387. doi:  
1002 10.1152/jn.00985.2007

- 1003 Smith, J. C., Ellenberger, H. H., Ballanyi, K., Richter, D. W., & Feldman, J. L. (1991). Pre-  
1004 Botzinger complex: a brainstem region that may generate respiratory rhythm in  
1005 mammals. *Science*, 254(5032), 726-729.
- 1006 Song, H., Hayes, J. A., Vann, N. C., Drew LaMar, M., & Del Negro, C. A. (2015). Mechanisms  
1007 Leading to Rhythm Cessation in the Respiratory PreBotzinger Complex Due to  
1008 Piecewise Cumulative Neuronal Deletions(1,2,3). *eneuro*, 2(4).  
1009 doi:10.1523/ENEURO.0031-15.2015
- 1010 Thebault, S., Zholos, A., Enfissi, A., Slomianny, C., Dewailly, E., Roudbaraki, M., Parys, J.,  
1011 & Prevarskaya, N. (2005). Receptor-operated Ca<sup>2+</sup> entry mediated by TRPC3/TRPC6  
1012 proteins in rat prostate smooth muscle (PS1) cell line. *J Cell Physiol*, 204(1), 320-328.  
1013 doi:10.1002/jcp.20301
- 1014 Thoby-Brisson, M., & Ramirez, J. M. (2001). Identification of two types of inspiratory  
1015 pacemaker neurons in the isolated respiratory neural network of mice. *J Neurophysiol*,  
1016 86(1), 104-112. doi:10.1152/jn.2001.86.1.104
- 1017 Toporikova, N., & Butera, R. J. (2011). Two types of independent bursting mechanisms in  
1018 inspiratory neurons: an integrative model. *Journal of Computational Neuroscience*,  
1019 30(3), 515-528. doi:10.1007/s10827-010-0274-z
- 1020 Toporikova, N., Chevalier, M., & Thoby-Brisson, M. (2015). Sigh and Eupnea  
1021 Rhythmogenesis Involve Distinct Interconnected Subpopulations: A Combined  
1022 Computational and Experimental Study. *eneuro*, 2(2). doi:10.1523/ENEURO.0074-  
1023 14.2015
- 1024 Ullrich, N. D., Voets, T., Prenen, J., Vennekens, R., Talavera, K., Droogmans, G., & Nilius, B.  
1025 (2005). Comparison of functional properties of the Ca<sup>2+</sup>-activated cation channels  
1026 TRPM4 and TRPM5 from mice. *Cell Calcium*, 37(3), 267-278.  
1027 doi:10.1016/j.ceca.2004.11.001
- 1028 Zitt, C., Obukhov, A. G., Strubing, C., Zobel, A., Kalkbrenner, F., Luckhoff, A., & Schultz, G.  
1029 (1997). Expression of TRPC3 in Chinese hamster ovary cells results in calcium-  
1030 activated cation currents not related to store depletion. *J Cell Biol*, 138(6), 1333-1341.
